# Supplementary material for: Targeting a secreted fungal effector protein providing a novel concept in combating rice blast
Source: Research Square preprint supplement (doi:10.21203/rs.3.rs-2335792/v1), 2022-12-14
Supplement: Supplementary file 1 [file a17a0610c88b2d389d5427e7.xlsx]

## Sheet: MGG_13009_CDS
Table S4 Sequence of MoERS1 gene in various rice balst isolates.
>MGG_13009 70-15
ATGCGCACCCAGTTCTCTCTCCTCGGAGTCGCGGCTCTCGCCAGCACCGTCGTCAACGCCATGCCCTCCACGCTCGAGGCCAGGGCCCTTCCCCAGGTTTCGGCCGTCGCCAAGCCGAGGGCGTGCTCCTCGTACCCGACCTTTGATCCCGCCACCGGCGAGGCTACCGAATTCATATTCTATGCCGACTCGACCGAGGAGCCTGTCGCTCCGTTCGCCGGTAGCGTGGTGGGGAAGTTGGCCAACCCCAACCTGGCCATTGCACGGATCGGAATCGCCGTCCGCGGAGATCTCGCGAAGGTCGTGACCAAGTGCTTCCCCGACGGCGGCGAAGAGGGACTCCGCACCCGCACGCACGGCGACTGGAGACGTCTCACCCTTGCCGGAGGCGAGGACGAA…
>MGG_13009_13FM-16-1 885 13FM-16-1_contig_1602_361826:21748-22632
ATGCGCACCCAGTTCTCTCTCCTCGGAGTCGCGGCTCTCGCCAGCACCGTCGTCAACGCCATGCCCTCCACGCTCGAGGCCAGGGCCCTTCCCCAGGTTTCGGCCGTCGCCAAGCCGAGGGCGTGCTCCTCGTACCCGACCTTTGATCCCGCCACCGGCGAGGCTACCGAATTCATATTCTATGCCGACTCGACCGAGGAGCCTGTCGCTCCGTTCGCCGGTAGCGTGGTGGGGAAGTTGGCCAACCCCAACCTGGCCATTGCACGGATCGGAATCGCCGTCCGCGGAGATCTCGCGAAGGTCGTGACCAAGTGCTTCCCCGACGGCGGCGAAGAGGGACTCCGCACCCGCACGCACGGCGACTGGAGACGTCTCACCCTTGCCGGAGGCGAGGACGAA…
>MGG_13009_13FM-24-1 886 13FM-24-1_contig_419_195725:94350-95235
ATGCGCACCCAGTTCTCTCTCCTCGGAGTCGCGGCTCTCGCCAGCACCGTCGTCAACGCCATGCCCTCCACGCTCGAGGCCAGGGCCCTTCCCCAGGTTTCGGCCGTCGCCAAGCCGAGGGCGTGCTCCTCGTACCCGACCTTTGATCCCGCCACCGGCGAGGCTACCGAATTCATATTCTATGCCGACTCGACCGAGGAGCCTGTCGCTCCGTTCGCCGGTAGCGTGGTGGGGAAGTTGGCCAACCCCAACCTGGCCATTGCACGGATCGGAATCGCCGTCCGCGGAGATCTCGCGAAGGTCGTGACCAAGTGCTTCCCCGACGGCGGCGAAGAGGGACTCCGCACCCGCACGCACGGCGACTGGAGACGTCTCACCCTTGCCGGAGGCGAGGACGAA…
>MGG_13009_13FM-3-2 885 13FM-3-2_contig_782_91148:56881-55997
ATGCGCACCCAGTTCTCTCTCCTCGGAGTCGCGGCTCTCGCCAGCACCGTCGTCAACGCCATGCCCTCCACGCTCGAGGCCAGGGCCCTTCCCCAGGTTTCGGCCGTCGCCAAGCCGAGGGCGTGCTCCTCGTACCCGACCTTTGATCCCGCCACCGGCGAGGCTACCGAATTCATATTCTATGCCGACTCGACCGAGGAGCCTGTCGCTCCGTTCGCCGGTAGCGTGGTGGGGAAGTTGGCCAACCCCAACCTGGCCATTGCACGGATCGGAATCGCCGTCCGCGGAGATCTCGCGAAGGTCGTGACCAAGTGCTTCCCCGACGGCGGCGAAGAGGGACTCCGCACCCGCACGCACGGCGACTGGAGACGTCTCACCCTTGCCGGAGGCGAGGACGAA…
>MGG_13009_13FM-5-1 886 13FM-5-1_contig_1493_166360:101490-100605
ATGCGCACCCAGTTCTCTCTCCTCGGAGTCGCGGCTCTCGCCAGCACCGTCGTCAACGCCATGCCCTCCACGCTCGAGGCCAGGGCCCTTCCCCAGGTTTCGGCCGTCGCCAAGCCGAGGGCGTGCTCCTCGTACCCGACCTTTGATCCCGCCACCGGCGAGGCTACCGAATTCATATTCTATGCCGACTCGACCGAGGAGCCTGTCGCTCCGTTCGCCGGTAGCGTGGTGGGGAAGTTGGCCAACCCCAACCTGGCCATTGCACGGATCGGAATCGCCGTCCGCGGAGATCTCGCGAAGGTCGTGACCAAGTGCTTCCCCGACGGCGGCGAAGAGGGACTCCGCACCCGCACGCACGGCGACTGGAGACGTCTCACCCTTGCCGGAGGCGAGGACGAA…
>MGG_13009_13FM-9-1 885 13FM-9-1_contig_319_91170:56985-56101
ATGCGCACCCAGTTCTCTCTCCTCGGAGTCGCGGCTCTCGCCAGCACCGTCGTCAACGCCATGCCCTCCACGCTCGAGGCCAGGGCCCTTCCCCAGGTTTCGGCCGTCGCCAAGCCGAGGGCGTGCTCCTCGTACCCGACCTTTGATCCCGCCACCGGCGAGGCTACCGAATTCATATTCTATGCCGACTCGACCGAGGAGCCTGTCGCTCCGTTCGCCGGTAGCGTGGTGGGGAAGTTGGCCAACCCCAACCTGGCCATTGCACGGATCGGAATCGCCGTCCGCGGAGATCTCGCGAAGGTCGTGACCAAGTGCTTCCCCGACGGCGGCGAAGAGGGACTCCGCACCCGCACGCACGGCGACTGGAGACGTCTCACCCTTGCCGGAGGCGAGGACGAA…
>MGG_13009_2539_contig 886 2539_contig_13_212789bp_212789:16643-15758
ATGCGCACCCAGTTCTCTCTCCTCGGAGTCGCGGCTCTCGCCAGCACCGTCGTCAACGCCATGCCCTCCACGCTCGAGGCCAGGGCCCTTCCCCAGGTTTCGGCCGTCGCCAAGCCGAGGGCGTGCTCCTCGTACCCGACCTTTGATCCCGCCACCGGCGAGGCTACCGAATTCATATTCTATGCCGACTCGACCGAGGAGCCTGTCGCTCCGTTCGCCGGTAGCGTGGTGGGGAAGTTGGCCAACCCCAACCTGGCCATTGCACGGATCGGAATCGCCGTCCGCGGAGATCTCGCGAAGGTCGTGACCAAGTGCTTCCCCGACGGCGGCGAAGAGGGACTCCGCACCCGCACGCACGGCGACTGGAGGCGTCTCACCCTTGCCGGAGGCGAGGACGAA…
>MGG_13009_81278_contig_v1_filtered 885 FJ81278_contig_10_1734154:294619-295502
ATGCGCACCCAGTTCTCTCTCCTCGGAGTCGCGGCTCTCGCCAGCACCGTCGTCAACGCCATGCCCTCCACGCTCGAGGCCAGGGCCCTTCCCCAGGTTTCGGCCGTCGCCAAGCCGAGGGCGTGCTCCTCGTACCCGACCTTTGATCCCGCCACCGGCGAGGCTACCGAATTCATATTCTATGCCGACTCGACCGAGGAGCCTGTCGCTCCGTTCGCCGGTAGCGTGGTGGGGAAGTTGGCCAACCCCAACCTGGCCATTGCACGGATCGGAATCGCCGTCCGCGGAGATCTCGCGAAGGTCGTGACCAAGTGCTTCCCCGACGGCGGCGAAGAGGGACTCCGCACCCGCACGCACGGCGACTGGAGACGTCTCACCCTTGCCGGAGGCGAGGACGAA…
>MGG_13009_81278_I_contig_filtered 885 81278_contig_1428_151212:56865-55982
ATGCGCACCCAGTTCTCTCTCCTCGGAGTCGCGGCTCTCGCCAGCACCGTCGTCAACGCCATGCCCTCCACGCTCGAGGCCAGGGCCCTTCCCCAGGTTTCGGCCGTCGCCAAGCCGAGGGCGTGCTCCTCGTACCCGACCTTTGATCCCGCCACCGGCGAGGCTACCGAATTCATATTCTATGCCGACTCGACCGAGGAGCCTGTCGCTCCGTTCGCCGGTAGCGTGGTGGGGAAGTTGGCCAACCCCAACCTGGCCATTGCACGGATCGGAATCGCCGTCCGCGGAGATCTCGCGAAGGTCGTGACCAAGTGCTTCCCCGACGGCGGCGAAGAGGGACTCCGCACCCGCACGCACGGCGACTGGAGACGTCTCACCCTTGCCGGAGGCGAGGACGAA…
>MGG_13009_98-06_contig 885 98-06_contig_378_112237bp_112237:69694-70578
ATGCGCACCCAGTTCTCTCTCCTCGGAGTCGCGGCTCTCGCCAGCACCGTCGTCAACGCCATGCCCTCCACGCTCGAGGCCAGGGCCCTTCCCCAGGTTTCGGCCGTCGCCAAGCCGAGGGCGTGCTCCTCGTACCCGACCTTTGATCCCGCCACCGGCGAGGCTACCGAATTCATATTCTATGCCGACTCGACCGAGGAGCCTGTCGCTCCGTTCGCCGGTAGCGTGGTGGGGAAGTTGGCCAACCCCAACCTGGCCATTGCACGGATCGGAATCGCCGTCCGCGGAGATCTCGCGAAGGTCGTGACCAAGTGCTTCCCCGACGGCGGCGAAGAGGGACTCCGCACCCGCACGCACGGCGACTGGAGACGTCTCACCCTTGCCGGAGGCGAGGACGAA…
>MGG_13009_AV1-1-1 886 AV1-1-1_contig_94_312204:245737-246622
ATGCGCACCCAGTTCTCTCTCCTCGGAGTCGCGGCTCTCGCCAGCACCGTCGTCAACGCCATGCCCTCCACGCTCGAGGCCAGGGCCCTTCCCCAGGTTTCGGCCGTCGCCAAGCCGAGGGCGTGCTCCTCGTACCCGACCTTTGATCCCGCCACCGGCGAGGCTACCGAATTCATATTCTATGCCGACTCGACCGAGGAGCCTGTCGCTCCGTTCGCCGGTAGCGTGGTGGGGAAGTTGGCCAACCCCAACCTGGCCATTGCACGGATCGGAATCGCCGTCCGCGGAGATCTCGCGAAGGTCGTGACCAAGTGCTTCCCCGACGGCGGCGAAGAGGGACTCCGCACCCGCACGCACGGCGACTGGAGACGTCTCACCCTTGCCGGAGGCGAGGACGAA…
>MGG_13009_B157_contig 885 B157_contig_2910_1961:364-1248
ATGCGCACCCAGTTCTCTCTCCTCGGAGTCGCGGCTCTCGCCAGCACCGTCGTCAACGCCATGCCCTCCACGCTCGAGGCCAGGGCCCTTCCCCAGGTTTCGGCCGTCGCCAAGCCGAGGGCGTGCTCCTCGTACCCGACCTTTGATCCCGCCACCGGCGAGGCTACCGAATTCATATTCTATGCCGACTCGACCGAGGAGCCTGTCGCTCCGTTCGCCGGTAGCGTGGTGGGGAAGTTGGCCAACCCCAACCTGGCCATTGCACGGATCGGAATCGCCGTCCGCGGAGATCTCGCGAAGGTCGTGACCAAGTGCTTCCCCGACGGCGGCGAAGAGGGACTCCGCACCCGCACGCACGGCGACTGGAGACGTCTCACCCTTGCCGGAGGCGAGGACGAA…
>MGG_13009_BJ-90-611 885 BJ-90-611_contig_1076_91180:34181-35065
ATGCGCACCCAGTTCTCTCTCCTCGGAGTCGCGGCTCTCGCCAGCACCGTCGTCAACGCCATGCCCTCCACGCTCGAGGCCAGGGCCCTTCCCCAGGTTTCGGCCGTCGCCAAGCCGAGGGCGTGCTCCTCGTACCCGACCTTTGATCCCGCCACCGGCGAGGCTACCGAATTCATATTCTATGCCGACTCGACCGAGGAGCCTGTCGCTCCGTTCGCCGGTAGCGTGGTGGGGAAGTTGGCCAACCCCAACCTGGCCATTGCACGGATCGGAATCGCCGTCCGCGGAGATCTCGCGAAGGTCGTGACCAAGTGCTTCCCCGACGGCGGCGAAGAGGGACTCCGCACCCGCACGCACGGCGACTGGAGACGTCTCACCCTTGCCGGAGGCGAGGACGAA…
>MGG_13009_BJ08-8 885 BJ08-8_contig_1473_91062:56874-55990
ATGCGCACCCAGTTCTCTCTCCTCGGAGTCGCGGCTCTCGCCAGCACCGTCGTCAACGCCATGCCCTCCACGCTCGAGGCCAGGGCCCTTCCCCAGGTTTCGGCCGTCGCCAAGCCGAGGGCGTGCTCCTCGTACCCGACCTTTGATCCCGCCACCGGCGAGGCTACCGAATTCATATTCTATGCCGACTCGACCGAGGAGCCTGTCGCTCCGTTCGCCGGTAGCGTGGTGGGGAAGTTGGCCAACCCCAACCTGGCCATTGCACGGATCGGAATCGCCGTCCGCGGAGATCTCGCGAAGGTCGTGACCAAGTGCTTCCCCGACGGCGGCGAAGAGGGACTCCGCACCCGCACGCACGGCGACTGGAGACGTCTCACCCTTGCCGGAGGCGAGGACGAA…
>MGG_13009_Br62_contig 885 Br62_NODE_3416_length_50857_cov_13.623749_50931:16651-15767
ATGCGCACCCAGTTCTCTCTCCTCGGAGTCGCGGCTCTCGCCAGCACCGTCGTCAACGCCATGCCCTCCACGCTCGAGGCCAGGGCCCTTCCCCAGGTTTCGGCCGTCGCCAAGCCGAGGGCGTGCTCCTCGTACCCGACCTTTGATCCCGCCACCGGCGAGGCTACCGAATTCATATTCTATGCCGACTCGACCGAGGAGCCTGTCGCTCCGTTCGCCGGTAGCGTGGTGGGGAAGTTGGCCAACCCCAACCTGGCCATTGCACGGATCGGAATCGCCGTCCGCGGAGATCTCGCGAAGGTCGTGACCAAGTGCTTCCCCGACGGCGGCGAAGAGGGACTCCGCACCCGCACGCACGGCGACTGGAGGCGTCTCACCCTTGCCGGAGGCGAGGACGAA…
>MGG_13009_DB11-621 885 DB11-621_contig_1148_91065:34186-35070
ATGCGCACCCAGTTCTCTCTCCTCGGAGTCGCGGCTCTCGCCAGCACCGTCGTCAACGCCATGCCCTCCACGCTCGAGGCCAGGGCCCTTCCCCAGGTTTCGGCCGTCGCCAAGCCGAGGGCGTGCTCCTCGTACCCGACCTTTGATCCCGCCACCGGCGAGGCTACCGAATTCATATTCTATGCCGACTCGACCGAGGAGCCTGTCGCTCCGTTCGCCGGTAGCGTGGTGGGGAAGTTGGCCAACCCCAACCTGGCCATTGCACGGATCGGAATCGCCGTCCGCGGAGATCTCGCGAAGGTCGTGACCAAGTGCTTCCCCGACGGCGGCGAAGAGGGACTCCGCACCCGCACGCACGGCGACTGGAGACGTCTCACCCTTGCCGGAGGCGAGGACGAA…
>MGG_13009_EI9411_contig 886 EI9411_contig_996_36583bp_36583:34222-35107
ATGCGCACCCAGTTCTCTCTCCTCGGAGTCGCGGCTCTCGCCAGCACCGTCGTCAACGCCATGCCCTCCACGCTCGAGGCCAGGGCCCTTCCCCAGGTTTCGGCCGTCGCCAAGCCGAGGGCGTGCTCCTCGTACCCGACCTTTGATCCCGCCACCGGCGAGGCTACCGAATTCATATTCTATGCCGACTCGACCGAGGAGCCTGTCGCTCCGTTCGCCGGTAGCGTGGTGGGGAAGTTGGCCAACCCCAACCTGGCCATTGCACGGATCGGAATCGCCGTCCGCGGAGATCTCGCGAAGGTCGTGACCAAGTGCTTCCCCGACGGCGGCGAAGAGGGACTCCGCACCCGCACGCACGGCGACTGGAGGCGTCTCACCCTTGCCGGAGGCGAGGACGAA…
>MGG_13009_EI9604_contig 885 EI9604_contig_1133_4889bp_4889:2530-3414
ATGCGCACCCAGTTCTCTCTCCTCGGAGTCGCGGCTCTCGCCAGCACCGTCGTCAACGCCATGCCCTCCACGCTCGAGGCCAGGGCCCTTCCCCAGGTTTCGGCCGTCGCCAAGCCGAGGGCGTGCTCCTCGTACCCGACCTTTGATCCCGCCACCGGCGAGGCTACCGAATTCATATTCTATGCCGACTCGACCGAGGAGCCTGTCGCTCCGTTCGCCGGTAGCGTGGTGGGGAAGTTGGCCAACCCCAACCTGGCCATTGCACGGATCGGAATCGCCGTCCGCGGAGATCTCGCGAAGGTCGTGACCAAGTGCTTCCCCGACGGCGGCGAAGAGGGACTCCGCACCCGCACGCACGGCGACTGGAGGCGTCTCACCCTTGCCGGAGGCGAGGACGAA…
>MGG_13009_FJ0204804 886 FJ0204804_contig_95_195279:100922-100037
ATGCGCACCCAGTTCTCTCTCCTCGGAGTCGCGGCTCTCGCCAGCACCGTCGTCAACGCCATGCCCTCCACGCTCGAGGCCAGGGCCCTTCCCCAGGTTTCGGCCGTCGCCAAGCCGAGGGCGTGCTCCTCGTACCCGACCTTTGATCCCGCCACCGGCGAGGCTACCGAATTCATATTCTATGCCGACTCGACCGAGGAGCCTGTCGCTCCGTTCGCCGGTAGCGTGGTGGGGAAGTTGGCCAACCCCAACCTGGCCATTGCACGGATCGGAATCGCCGTCCGCGGAGATCTCGCGAAGGTCGTGACCAAGTGCTTCCCCGACGGCGGCGAAGAGGGACTCCGCACCCGCACGCACGGCGACTGGAGACGTCTCACCCTTGCCGGAGGCGAGGACGAA…
>MGG_13009_FJ11SH-527-1 607 Tag FJ11SH-527-1_contig_1590_240797:100739-100134
TTTTTTTTTCTTCTTTTTTCCCCTGGTGGCTAGCATTGTACTCCCGTTTTGTGTAGTATAATAGGGGTAATTATGGCTAACATCGAGGGGCTACGTCGTCGATAGATCGGAATCGCCGTCCGCGGAGATCTCGCGAAGGTCGTGACCAAGTGCTTCCCCGACGGCGGCGAAGAGGGACTCCGCACCCGCACGCACGGCGACTGGAGACGTCTCACCCTTGCCGGAGGCGAGGACGAAAACATCATCTTGATCGGCCAAGGTCCAGTGGCCCACCGACCCTTGACCCCCCACGATCACTTCTTCGCCAACGGCACGCAGCAGCCCGGCGTCTTTATGGGCGACAACGGATCGACCACCTGGGCCTTCTCGAGGAAGGACGCCAGCGCCAGTGAGCCGTTC…
>MGG_13009_FJ11YD-673-1 886 FJ11YD-673-1_contig_410_195339:94439-95324
ATGCGCACCCAGTTCTCTCTCCTCGGAGTCGCGGCTCTCGCCAGCACCGTCGTCAACGCCATGCCCTCCACGCTCGAGGCCAGGGCCCTTCCCCAGGTTTCGGCCGTCGCCAAGCCGAGGGCGTGCTCCTCGTACCCGACCTTTGATCCCGCCACCGGCGAGGCTACCGAATTCATATTCTATGCCGACTCGACCGAGGAGCCTGTCGCTCCGTTCGCCGGTAGCGTGGTGGGGAAGTTGGCCAACCCCAACCTGGCCATTGCACGGATCGGAATCGCCGTCCGCGGAGATCTCGCGAAGGTCGTGACCAAGTGCTTCCCCGACGGCGGCGAAGAGGGACTCCGCACCCGCACGCACGGCGACTGGAGACGTCTCACCCTTGCCGGAGGCGAGGACGAA…
>MGG_13009_FJ12JN-084-3 886 FJ12JN-084-3_contig_1510_119152:20734-21619
ATGCGCACCCAGTTCTCTCTCCTCGGAGTCGCGGCTCTCGCCAGCACCGTCGTCAACGCCATGCCCTCCACGCTCGAGGCCAGGGCCCTTCCCCAGGTTTCGGCCGTCGCCAAGCCGAGGGCGTGCTCCTCGTACCCGACCTTTGATCCCGCCACCGGCGAGGCTACCGAATTCATATTCTATGCCGACTCGACCGAGGAGCCTGTCGCTCCGTTCGCCGGTAGCGTGGTGGGGAAGTTGGCCAACCCCAACCTGGCCATTGCACGGATCGGAATCGCCGTCCGCGGAGATCTCGCGAAGGTCGTGACCAAGTGCTTCCCCGACGGCGGCGAAGAGGGACTCCGCACCCGCACGCACGGCGACTGGAGACGTCTCACCCTTGCCGGAGGCGAGGACGAA…
>MGG_13009_FJ13SH05-2 886 FJ13SH05-2_contig_556_339996:286366-285481
ATGCGCACCCAGTTCTCTCTCCTCGGAGTCGCGGCTCTCGCCAGCACCGTCGTCAACGCCATGCCCTCCACGCTCGAGGCCAGGGCCCTTCCCCAGGTTTCGGCCGTCGCCAAGCCGAGGGCGTGCTCCTCGTACCCGACCTTTGATCCCGCCACCGGCGAGGCTACCGAATTCATATTCTATGCCGACTCGACCGAGGAGCCTGTCGCTCCGTTCGCCGGTAGCGTGGTGGGGAAGTTGGCCAACCCCAACCTGGCCATTGCACGGATCGGAATCGCCGTCCGCGGAGATCTCGCGAAGGTCGTGACCAAGTGCTTCCCCGACGGCGGCGAAGAGGGACTCCGCACCCGCACGCACGGCGACTGGAGACGTCTCACCCTTGCCGGAGGCGAGGACGAA…
>MGG_13009_FJ2000-62A 886 FJ2000-62A_contig_103_202997:66484-65599
ATGCGCACCCAGTTCTCTCTCCTCGGAGTCGCGGCTCTCGCCAGCACCGTCGTCAACGCCATGCCCTCCACGCTCGAGGCCAGGGCCCTTCCCCAGGTTTCGGCCGTCGCCAAGCCGAGGGCGTGCTCCTCGTACCCGACCTTTGATCCCGCCACCGGCGAGGCTACCGAATTCATATTCTATGCCGACTCGACCGAGGAGCCTGTCGCTCCGTTCGCCGGTAGCGTGGTGGGGAAGTTGGCCAACCCCAACCTGGCCATTGCACGGATCGGAATCGCCGTCCGCGGAGATCTCGCGAAGGTCGTGACCAAGTGCTTCCCCGACGGCGGCGAAGAGGGACTCCGCACCCGCACGCACGGCGACTGGAGACGTCTCACCCTTGCCGGAGGCGAGGACGAA…
>MGG_13009_FJ2000-69A 886 FJ2000-69A_contig_158_358195:324253-325138
ATGCGCACCCAGTTCTCTCTCCTCGGAGTCGCGGCTCTCGCCAGCACCGTCGTCAACGCCATGCCCTCCACGCTCGAGGCCAGGGCCCTTCCCCAGGTTTCGGCCGTCGCCAAGCCGAGGGCGTGCTCCTCGTACCCGACCTTTGATCCCGCCACCGGCGAGGCTACCGAATTCATATTCTATGCCGACTCGACCGAGGAGCCTGTCGCTCCGTTCGCCGGTAGCGTGGTGGGGAAGTTGGCCAACCCCAACCTGGCCATTGCACGGATCGGAATCGCCGTCCGCGGAGATCTCGCGAAGGTCGTGACCAAGTGCTTCCCCGACGGCGGCGAAGAGGGACTCCGCACCCGCACGCACGGCGACTGGAGACGTCTCACCCTTGCCGGAGGCGAGGACGAA…
>MGG_13009_FJ2001-112B 886 FJ2001-112B_contig_1671_312166:245648-246533
ATGCGCACCCAGTTCTCTCTCCTCGGAGTCGCGGCTCTCGCCAGCACCGTCGTCAACGCCATGCCCTCCACGCTCGAGGCCAGGGCCCTTCCCCAGGTTTCGGCCGTCGCCAAGCCGAGGGCGTGCTCCTCGTACCCGACCTTTGATCCCGCCACCGGCGAGGCTACCGAATTCATATTCTATGCCGACTCGACCGAGGAGCCTGTCGCTCCGTTCGCCGGTAGCGTGGTGGGGAAGTTGGCCAACCCCAACCTGGCCATTGCACGGATCGGAATCGCCGTCCGCGGAGATCTCGCGAAGGTCGTGACCAAGTGCTTCCCCGACGGCGGCGAAGAGGGACTCCGCACCCGCACGCACGGCGACTGGAGACGTCTCACCCTTGCCGGAGGCGAGGACGAA…
>MGG_13009_FJ2003-001A1 886 FJ2003-001A1_contig_1200_300522:245590-246475
ATGCGCACCCAGTTCTCTCTCCTCGGAGTCGCGGCTCTCGCCAGCACCGTCGTCAACGCCATGCCCTCCACGCTCGAGGCCAGGGCCCTTCCCCAGGTTTCGGCCGTCGCCAAGCCGAGGGCGTGCTCCTCGTACCCGACCTTTGATCCCGCCACCGGCGAGGCTACCGAATTCATATTCTATGCCGACTCGACCGAGGAGCCTGTCGCTCCGTTCGCCGGTAGCGTGGTGGGGAAGTTGGCCAACCCCAACCTGGCCATTGCACGGATCGGAATCGCCGTCCGCGGAGATCTCGCGAAGGTCGTGACCAAGTGCTTCCCCGACGGCGGCGAAGAGGGACTCCGCACCCGCACGCACGGCGACTGGAGACGTCTCACCCTTGCCGGAGGCGAGGACGAA…
>MGG_13009_FJ2005113B 886 FJ2005113B_contig_1354_304250:203245-204130
ATGCGCACCCAGTTCTCTCTCCTCGGAGTCGCGGCTCTCGCCAGCACCGTCGTCAACGCCATGCCCTCCACGCTCGAGGCCAGGGCCCTTCCCCAGGTTTCGGCCGTCGCCAAGCCGAGGGCGTGCTCCTCGTACCCGACCTTTGATCCCGCCACCGGCGAGGCTACCGAATTCATATTCTATGCCGACTCGACCGAGGAGCCTGTCGCTCCGTTCGCCGGTAGCGTGGTGGGGAAGTTGGCCAACCCCAACCTGGCCATTGCACGGATCGGAATCGCCGTCCGCGGAGATCTCGCGAAGGTCGTGACCAAGTGCTTCCCCGACGGCGGCGAAGAGGGACTCCGCACCCGCACGCACGGCGACTGGAGACGTCTCACCCTTGCCGGAGGCGAGGACGAA…
>MGG_13009_FJ2006-60A3 886 FJ2006-60A3_contig_1098_87160:66491-65606
ATGCGCACCCAGTTCTCTCTCCTCGGAGTCGCGGCTCTCGCCAGCACCGTCGTCAACGCCATGCCCTCCACGCTCGAGGCCAGGGCCCTTCCCCAGGTTTCGGCCGTCGCCAAGCCGAGGGCGTGCTCCTCGTACCCGACCTTTGATCCCGCCACCGGCGAGGCTACCGAATTCATATTCTATGCCGACTCGACCGAGGAGCCTGTCGCTCCGTTCGCCGGTAGCGTGGTGGGGAAGTTGGCCAACCCCAACCTGGCCATTGCACGGATCGGAATCGCCGTCCGCGGAGATCTCGCGAAGGTCGTGACCAAGTGCTTCCCCGACGGCGGCGAAGAGGGACTCCGCACCCGCACGCACGGCGACTGGAGACGTCTCACCCTTGCCGGAGGCGAGGACGAA…
>MGG_13009_FJ43ZB15-68 885 FJ43ZB15-68_contig_175_213887:166581-167465
ATGCGCACCCAGTTCTCTCTCCTCGGAGTCGCGGCTCTCGCCAGCACCGTCGTCAACGCCATGCCCTCCACGCTCGAGGCCAGGGCCCTTCCCCAGGTTTCGGCCGTCGCCAAGCCGAGGGCGTGCTCCTCGTACCCGACCTTTGATCCCGCCACCGGCGAGGCTACCGAATTCATATTCTATGCCGACTCGACCGAGGAGCCTGTCGCTCCGTTCGCCGGTAGCGTGGTGGGGAAGTTGGCCAACCCCAACCTGGCCATTGCACGGATCGGAATCGCCGTCCGCGGAGATCTCGCGAAGGTCGTGACCAAGTGCTTCCCCGACGGCGGCGAAGAGGGACTCCGCACCCGCACGCACGGCGACTGGAGACGTCTCACCCTTGCCGGAGGCGAGGACGAA…
>MGG_13009_FJ72ZC7-77 886 FJ72ZC7-77_contig_151_271791:228191-229076
ATGCGCACCCAGTTCTCTCTCCTCGGAGTCGCGGCTCTCGCCAGCACCGTCGTCAACGCCATGCCCTCCACGCTCGAGGCCAGGGCCCTTCCCCAGGTTTCGGCCGTCGCCAAGCCGAGGGCGTGCTCCTCGTACCCGACCTTTGATCCCGCCACCGGCGAGGCTACCGAATTCATATTCTATGCCGACTCGACCGAGGAGCCTGTCGCTCCGTTCGCCGGTAGCGTGGTGGGGAAGTTGGCCAACCCCAACCTGGCCATTGCACGGATCGGAATCGCCGTCCGCGGAGATCTCGCGAAGGTCGTGACCAAGTGCTTCCCCGACGGCGGCGAAGAGGGACTCCGCACCCGCACGCACGGCGACTGGAGACGTCTCACCCTTGCCGGAGGCGAGGACGAA…
>MGG_13009_FJ78-JJ 885 FJ78-JJ_contig_147_50127:34187-35071
ATGCGCACCCAGTTCTCTCTCCTCGGAGTCGCGGCTCTCGCCAGCACCGTCGTCAACGCCATGCCCTCCACGCTCGAGGCCAGGGCCCTTCCCCAGGTTTCGGCCGTCGCCAAGCCGAGGGCGTGCTCCTCGTACCCGACCTTTGATCCCGCCACCGGCGAGGCTACCGAATTCATATTCTATGCCGACTCGACCGAGGAGCCTGTCGCTCCGTTCGCCGGTAGCGTGGTGGGGAAGTTGGCCAACCCCAACCTGGCCATTGCACGGATCGGAATCGCCGTCCGCGGAGATCTCGCGAAGGTCGTGACCAAGTGCTTCCCCGACGGCGGCGAAGAGGGACTCCGCACCCGCACGCACGGCGACTGGAGACGTCTCACCCTTGCCGGAGGCGAGGACGAA…
>MGG_13009_FJ81-JY 885 FJ81-JY_contig_289_34559:18589-19473
ATGCGCACCCAGTTCTCTCTCCTCGGAGTCGCGGCTCTCGCCAGCACCGTCGTCAACGCCATGCCCTCCACGCTCGAGGCCAGGGCCCTTCCCCAGGTTTCGGCCGTCGCCAAGCCGAGGGCGTGCTCCTCGTACCCGACCTTTGATCCCGCCACCGGCGAGGCTACCGAATTCATATTCTATGCCGACTCGACCGAGGAGCCTGTCGCTCCGTTCGCCGGTAGCGTGGTGGGGAAGTTGGCCAACCCCAACCTGGCCATTGCACGGATCGGAATCGCCGTCCGCGGAGATCTCGCGAAGGTCGTGACCAAGTGCTTCCCCGACGGCGGCGAAGAGGGACTCCGCACCCGCACGCACGGCGACTGGAGACGTCTCACCCTTGCCGGAGGCGAGGACGAA…
>MGG_13009_FJ81-MH 885 FJ81-MH_contig_1102_110293:94295-95178
ATGCGCACCCAGTTCTCTCTCCTCGGAGTCGCGGCTCTCGCCAGCACCGTCGTCAACGCCATGCCCTCCACGCTCGAGGCCAGGGCCCTTCCCCAGGTTTCGGCCGTCGCCAAGCCGAGGGCGTGCTCCTCGTACCCGACCTTTGATCCCGCCACCGGCGAGGCTACCGAATTCATATTCTATGCCGACTCGACCGAGGAGCCTGTCGCTCCGTTCGCCGGTAGCGTGGTGGGGAAGTTGGCCAACCCCAACCTGGCCATTGCACGGATCGGAATCGCCGTCCGCGGAGATCTCGCGAAGGTCGTGACCAAGTGCTTCCCCGACGGCGGCGAAGAGGGACTCCGCACCCGCACGCACGGCGACTGGAGACGTCTCACCCTTGCCGGAGGCGAGGACGAA…
>MGG_13009_FJ81-SW 885 FJ81-SW_contig_386_91066:34186-35070
ATGCGCACCCAGTTCTCTCTCCTCGGAGTCGCGGCTCTCGCCAGCACCGTCGTCAACGCCATGCCCTCCACGCTCGAGGCCAGGGCCCTTCCCCAGGTTTCGGCCGTCGCCAAGCCGAGGGCGTGCTCCTCGTACCCGACCTTTGATCCCGCCACCGGCGAGGCTACCGAATTCATATTCTATGCCGACTCGACCGAGGAGCCTGTCGCTCCGTTCGCCGGTAGCGTGGTGGGGAAGTTGGCCAACCCCAACCTGGCCATTGCACGGATCGGAATCGCCGTCCGCGGAGATCTCGCGAAGGTCGTGACCAAGTGCTTCCCCGACGGCGGCGAAGAGGGACTCCGCACCCGCACGCACGGCGACTGGAGACGTCTCACCCTTGCCGGAGGCGAGGACGAA…
>MGG_13009_FJ81-ZP 885 FJ81-ZP_contig_220_110296:94331-95214
ATGCGCACCCAGTTCTCTCTCCTCGGAGTCGCGGCTCTCGCCAGCACCGTCGTCAACGCCATGCCCTCCACGCTCGAGGCCAGGGCCCTTCCCCAGGTTTCGGCCGTCGCCAAGCCGAGGGCGTGCTCCTCGTACCCGACCTTTGATCCCGCCACCGGCGAGGCTACCGAATTCATATTCTATGCCGACTCGACCGAGGAGCCTGTCGCTCCGTTCGCCGGTAGCGTGGTGGGGAAGTTGGCCAACCCCAACCTGGCCATTGCACGGATCGGAATCGCCGTCCGCGGAGATCTCGCGAAGGTCGTGACCAAGTGCTTCCCCGACGGCGGCGAAGAGGGACTCCGCACCCGCACGCACGGCGACTGGAGACGTCTCACCCTTGCCGGAGGCGAGGACGAA…
>MGG_13009_FJ81221ZB11-14 885 FJ81221ZB11-14_contig_203_151262:56893-56010
ATGCGCACCCAGTTCTCTCTCCTCGGAGTCGCGGCTCTCGCCAGCACCGTCGTCAACGCCATGCCCTCCACGCTCGAGGCCAGGGCCCTTCCCCAGGTTTCGGCCGTCGCCAAGCCGAGGGCGTGCTCCTCGTACCCGACCTTTGATCCCGCCACCGGCGAGGCTACCGAATTCATATTCTATGCCGACTCGACCGAGGAGCCTGTCGCTCCGTTCGCCGGTAGCGTGGTGGGGAAGTTGGCCAACCCCAACCTGGCCATTGCACGGATCGGAATCGCCGTCCGCGGAGATCTCGCGAAGGTCGTGACCAAGTGCTTCCCCGACGGCGGCGAAGAGGGACTCCGCACCCGCACGCACGGCGACTGGAGACGTCTCACCCTTGCCGGAGGCGAGGACGAA…
>MGG_13009_FJ86-CT 885 FJ86-CT_contig_1098_167299:151281-152165
ATGCGCACCCAGTTCTCTCTCCTCGGAGTCGCGGCTCTCGCCAGCACCGTCGTCAACGCCATGCCCTCCACGCTCGAGGCCAGGGCCCTTCCCCAGGTTTCGGCCGTCGCCAAGCCGAGGGCGTGCTCCTCGTACCCGACCTTTGATCCCGCCACCGGCGAGGCTACCGAATTCATATTCTATGCCGACTCGACCGAGGAGCCTGTCGCTCCGTTCGCCGGTAGCGTGGTGGGGAAGTTGGCCAACCCCAACCTGGCCATTGCACGGATCGGAATCGCCGTCCGCGGAGATCTCGCGAAGGTCGTGACCAAGTGCTTCCCCGACGGCGGCGAAGAGGGACTCCGCACCCGCACGCACGGCGACTGGAGACGTCTCACCCTTGCCGGAGGCGAGGACGAA…
>MGG_13009_FJ86061ZE3-39 885 FJ86061ZE3-39_contig_1713_151229:56884-56000
ATGCGCACCCAGTTCTCTCTCCTCGGAGTCGCGGCTCTCGCCAGCACCGTCGTCAACGCCATGCCCTCCACGCTCGAGGCCAGGGCCCTTCCCCAGGTTTCGGCCGTCGCCAAGCCGAGGGCGTGCTCCTCGTACCCGACCTTTGATCCCGCCACCGGCGAGGCTACCGAATTCATATTCTATGCCGACTCGACCGAGGAGCCTGTCGCTCCGTTCGCCGGTAGCGTGGTGGGGAAGTTGGCCAACCCCAACCTGGCCATTGCACGGATCGGAATCGCCGTCCGCGGAGATCTCGCGAAGGTCGTGACCAAGTGCTTCCCCGACGGCGGCGAAGAGGGACTCCGCACCCGCACGCACGGCGACTGGAGACGTCTCACCCTTGCCGGAGGCGAGGACGAA…
>MGG_13009_FJ95054B 885 FJ95054B_contig_1092_151204:94338-95221
ATGCGCACCCAGTTCTCTCTCCTCGGAGTCGCGGCTCTCGCCAGCACCGTCGTCAACGCCATGCCCTCCACGCTCGAGGCCAGGGCCCTTCCCCAGGTTTCGGCCGTCGCCAAGCCGAGGGCGTGCTCCTCGTACCCGACCTTTGATCCCGCCACCGGCGAGGCTACCGAATTCATATTCTATGCCGACTCGACCGAGGAGCCTGTCGCTCCGTTCGCCGGTAGCGTGGTGGGGAAGTTGGCCAACCCCAACCTGGCCATTGCACGGATCGGAATCGCCGTCCGCGGAGATCTCGCGAAGGTCGTGACCAAGTGCTTCCCCGACGGCGGCGAAGAGGGACTCCGCACCCGCACGCACGGCGACTGGAGACGTCTCACCCTTGCCGGAGGCGAGGACGAA…
>MGG_13009_FJ95085AZB13-116 886 FJ95085AZB13-116_contig_1636_160834:94362-95247
ATGCGCACCCAGTTCTCTCTCCTCGGAGTCGCGGCTCTCGCCAGCACCGTCGTCAACGCCATGCCCTCCACGCTCGAGGCCAGGGCCCTTCCCCAGGTTTCGGCCGTCGCCAAGCCGAGGGCGTGCTCCTCGTACCCGACCTTTGATCCCGCCACCGGCGAGGCTACCGAATTCATATTCTATGCCGACTCGACCGAGGAGCCTGTCGCTCCGTTCGCCGGTAGCGTGGTGGGGAAGTTGGCCAACCCCAACCTGGCCATTGCACGGATCGGAATCGCCGTCCGCGGAGATCTCGCGAAGGTCGTGACCAAGTGCTTCCCCGACGGCGGCGAAGAGGGACTCCGCACCCGCACGCACGGCGACTGGAGACGTCTCACCCTTGCCGGAGGCGAGGACGAA…
>MGG_13009_FJ98099 886 FJ98099_contig_1483_96729:94364-95249
ATGCGCACCCAGTTCTCTCTCCTCGGAGTCGCGGCTCTCGCCAGCACCGTCGTCAACGCCATGCCCTCCACGCTCGAGGCCAGGGCCCTTCCCCAGGTTTCGGCCGTCGCCAAGCCGAGGGCGTGCTCCTCGTACCCGACCTTTGATCCCGCCACCGGCGAGGCTACCGAATTCATATTCTATGCCGACTCGACCGAGGAGCCTGTCGCTCCGTTCGCCGGTAGCGTGGTGGGGAAGTTGGCCAACCCCAACCTGGCCATTGCACGGATCGGAATCGCCGTCCGCGGAGATCTCGCGAAGGTCGTGACCAAGTGCTTCCCCGACGGCGGCGAAGAGGGACTCCGCACCCGCACGCACGGCGACTGGAGACGTCTCACCCTTGCCGGAGGCGAGGACGAA…
>MGG_13009_FJ99138 886 FJ99138_contig_1344_36690:34215-35100
ATGCGCACCCAGTTCTCTCTCCTCGGAGTCGCGGCTCTCGCCAGCACCGTCGTCAACGCCATGCCCTCCACGCTCGAGGCCAGGGCCCTTCCCCAGGTTTCGGCCGTCGCCAAGCCGAGGGCGTGCTCCTCGTACCCGACCTTTGATCCCGCCACCGGCGAGGCTACCGAATTCATATTCTATGCCGACTCGACCGAGGAGCCTGTCGCTCCGTTCGCCGGTAGCGTGGTGGGGAAGTTGGCCAACCCCAACCTGGCCATTGCACGGATCGGAATCGCCGTCCGCGGAGATCTCGCGAAGGTCGTGACCAAGTGCTTCCCCGACGGCGGCGAAGAGGGACTCCGCACCCGCACGCACGGCGACTGGAGACGTCTCACCCTTGCCGGAGGCGAGGACGAA…
>MGG_13009_FJSH0703 886 FJSH0703_contig_943_195343:94355-95240
ATGCGCACCCAGTTCTCTCTCCTCGGAGTCGCGGCTCTCGCCAGCACCGTCGTCAACGCCATGCCCTCCACGCTCGAGGCCAGGGCCCTTCCCCAGGTTTCGGCCGTCGCCAAGCCGAGGGCGTGCTCCTCGTACCCGACCTTTGATCCCGCCACCGGCGAGGCTACCGAATTCATATTCTATGCCGACTCGACCGAGGAGCCTGTCGCTCCGTTCGCCGGTAGCGTGGTGGGGAAGTTGGCCAACCCCAACCTGGCCATTGCACGGATCGGAATCGCCGTCCGCGGAGATCTCGCGAAGGTCGTGACCAAGTGCTTCCCCGACGGCGGCGAAGAGGGACTCCGCACCCGCACGCACGGCGACTGGAGACGTCTCACCCTTGCCGGAGGCGAGGACGAA…
>MGG_13009_FR13_contig 885 FR13_scaffold00116_127750:95145-96029
ATGCGCACCCAGTTCTCTCTCCTCGGAGTCGCGGCTCTCGCCAGCACCGTCGTCAACGCCATGCCCTCCACGCTCGAGGCCAGGGCCCTTCCCCAGGTTTCGGCCGTCGCCAAGCCGAGGGCGTGCTCCTCGTACCCGACCTTTGATCCCGCCACCGGCGAGGCTACCGAATTCATATTCTATGCCGACTCGACCGAGGAGCCTGTCGCTCCGTTCGCCGGTAGCGTGGTGGGGAAGTTGGCCAACCCCAACCTGGCCATTGCACGGATCGGAATCGCCGTCCGCGGAGATCTCGCGAAGGTCGTGACCAAGTGCTTCCCCGACGGCGGCGAAGAGGGACTCCGCACCCGCACGCACGGCGACTGGAGACGTCTCACCCTTGCCGGAGGCGAGGACGAA…
>MGG_13009_GD-05-029b 886 GD-05-029b_contig_411_248133:245765-246650
ATGCGCACCCAGTTCTCTCTCCTCGGAGTCGCGGCTCTCGCCAGCACCGTCGTCAACGCCATGCCCTCCACGCTCGAGGCCAGGGCCCTTCCCCAGGTTTCGGCCGTCGCCAAGCCGAGGGCGTGCTCCTCGTACCCGACCTTTGATCCCGCCACCGGCGAGGCTACCGAATTCATATTCTATGCCGACTCGACCGAGGAGCCTGTCGCTCCGTTCGCCGGTAGCGTGGTGGGGAAGTTGGCCAACCCCAACCTGGCCATTGCACGGATCGGAATCGCCGTCCGCGGAGATCTCGCGAAGGTCGTGACCAAGTGCTTCCCCGACGGCGGCGAAGAGGGACTCCGCACCCGCACGCACGGCGACTGGAGACGTCTCACCCTTGCCGGAGGCGAGGACGAA…
>MGG_13009_GD06-53 886 GD06-53_contig_623_35781:19644-20529
ATGCGCACCCAGTTCTCTCTCCTCGGAGTCGCGGCTCTCGCCAGCACCGTCGTCAACGCCATGCCCTCCACGCTCGAGGCCAGGGCCCTTCCCCAGGTTTCGGCCGTCGCCAAGCCGAGGGCGTGCTCCTCGTACCCGACCTTTGATCCCGCCACCGGCGAGGCTACCGAATTCATATTCTATGCCGACTCGACCGAGGAGCCTGTCGCTCCGTTCGCCGGTAGCGTGGTGGGGAAGTTGGCCAACCCCAACCTGGCCATTGCACGGATCGGAATCGCCGTCCGCGGAGATCTCGCGAAGGTCGTGACCAAGTGCTTCCCCGACGGCGGCGAAGAGGGACTCCGCACCCGCACGCACGGCGACTGGAGACGTCTCACCCTTGCCGGAGGCGAGGACGAA…
>MGG_13009_GD08-2025 886 GD08-2025_contig_1620_135212:34200-35085
ATGCGCACCCAGTTCTCTCTCCTCGGAGTCGCGGCTCTCGCCAGCACCGTCGTCAACGCCATGCCCTCCACGCTCGAGGCCAGGGCCCTTCCCCAGGTTTCGGCCGTCGCCAAGCCGAGGGCGTGCTCCTCGTACCCGACCTTTGATCCCGCCACCGGCGAGGCTACCGAATTCATATTCTATGCCGACTCGACCGAGGAGCCTGTCGCTCCGTTCGCCGGTAGCGTGGTGGGGAAGTTGGCCAACCCCAACCTGGCCATTGCACGGATCGGAATCGCCGTCCGCGGAGATCTCGCGAAGGTCGTGACCAAGTGCTTCCCCGACGGCGGCGAAGAGGGACTCCGCACCCGCACGCACGGCGACTGGAGACGTCTCACCCTTGCCGGAGGCGAGGACGAA…
>MGG_13009_Guy11_contig_v1_filtered 885 Guy11_contig_2_5093716:1609572-1608688
ATGCGCACCCAGTTCTCTCTCCTCGGAGTCGCGGCTCTCGCCAGCACCGTCGTCAACGCCATGCCCTCCACGCTCGAGGCCAGGGCCCTTCCCCAGGTTTCGGCCGTCGCCAAGCCGAGGGCGTGCTCCTCGTACCCGACCTTTGATCCCGCCACCGGCGAGGCTACCGAATTCATATTCTATGCCGACTCGACCGAGGAGCCTGTCGCTCCGTTCGCCGGTAGCGTGGTGGGGAAGTTGGCCAACCCCAACCTGGCCATTGCACGGATCGGAATCGCCGTCCGCGGAGATCTCGCGAAGGTCGTGACCAAGTGCTTCCCCGACGGCGGCGAAGAGGGACTCCGCACCCGCACGCACGGCGACTGGAGACGTCTCACCCTTGCCGGAGGCGAGGACGAA…
>MGG_13009_Guy11_I_contig_filtered 885 Guy11_contig_296_78709:21773-22657
ATGCGCACCCAGTTCTCTCTCCTCGGAGTCGCGGCTCTCGCCAGCACCGTCGTCAACGCCATGCCCTCCACGCTCGAGGCCAGGGCCCTTCCCCAGGTTTCGGCCGTCGCCAAGCCGAGGGCGTGCTCCTCGTACCCGACCTTTGATCCCGCCACCGGCGAGGCTACCGAATTCATATTCTATGCCGACTCGACCGAGGAGCCTGTCGCTCCGTTCGCCGGTAGCGTGGTGGGGAAGTTGGCCAACCCCAACCTGGCCATTGCACGGATCGGAATCGCCGTCCGCGGAGATCTCGCGAAGGTCGTGACCAAGTGCTTCCCCGACGGCGGCGAAGAGGGACTCCGCACCCGCACGCACGGCGACTGGAGACGTCTCACCCTTGCCGGAGGCGAGGACGAA…
>MGG_13009_HB-14 885 HB-14_contig_1313_78029:21106-21990
ATGCGCACCCAGTTCTCTCTCCTCGGAGTCGCGGCTCTCGCCAGCACCGTCGTCAACGCCATGCCCTCCACGCTCGAGGCCAGGGCCCTTCCCCAGGTTTCGGCCGTCGCCAAGCCGAGGGCGTGCTCCTCGTACCCGACCTTTGATCCCGCCACCGGCGAGGCTACCGAATTCATATTCTATGCCGACTCGACCGAGGAGCCTGTCGCTCCGTTCGCCGGTAGCGTGGTGGGGAAGTTGGCCAACCCCAACCTGGCCATTGCACGGATCGGAATCGCCGTCCGCGGAGATCTCGCGAAGGTCGTGACCAAGTGCTTCCCCGACGGCGGCGAAGAGGGACTCCGCACCCGCACGCACGGCGACTGGAGACGTCTCACCCTTGCCGGAGGCGAGGACGAA…
>MGG_13009_HB-LTH18 885 HB-LTH18_contig_469_91080:56889-56005
ATGCGCACCCAGTTCTCTCTCCTCGGAGTCGCGGCTCTCGCCAGCACCGTCGTCAACGCCATGCCCTCCACGCTCGAGGCCAGGGCCCTTCCCCAGGTTTCGGCCGTCGCCAAGCCGAGGGCGTGCTCCTCGTACCCGACCTTTGATCCCGCCACCGGCGAGGCTACCGAATTCATATTCTATGCCGACTCGACCGAGGAGCCTGTCGCTCCGTTCGCCGGTAGCGTGGTGGGGAAGTTGGCCAACCCCAACCTGGCCATTGCACGGATCGGAATCGCCGTCCGCGGAGATCTCGCGAAGGTCGTGACCAAGTGCTTCCCCGACGGCGGCGAAGAGGGACTCCGCACCCGCACGCACGGCGACTGGAGACGTCTCACCCTTGCCGGAGGCGAGGACGAA…
>MGG_13009_HN-0812-3 885 HN-0812-3_contig_1313_183377:34179-35063
ATGCGCACCCAGTTCTCTCTCCTCGGAGTCGCGGCTCTCGCCAGCACCGTCGTCAACGCCATGCCCTCCACGCTCGAGGCCAGGGCCCTTCCCCAGGTTTCGGCCGTCGCCAAGCCGAGGGCGTGCTCCTCGTACCCGACCTTTGATCCCGCCACCGGCGAGGCTACCGAATTCATATTCTATGCCGACTCGACCGAGGAGCCTGTCGCTCCGTTCGCCGGTAGCGTGGTGGGGAAGTTGGCCAACCCCAACCTGGCCATTGCACGGATCGGAATCGCCGTCCGCGGAGATCTCGCGAAGGTCGTGACCAAGTGCTTCCCCGACGGCGGCGAAGAGGGACTCCGCACCCGCACGCACGGCGACTGGAGACGTCTCACCCTTGCCGGAGGCGAGGACGAA…
>MGG_13009_HN-158 886 HN-158_contig_588_50304:34190-35075
ATGCGCACCCAGTTCTCTCTCCTCGGAGTCGCGGCTCTCGCCAGCACCGTCGTCAACGCCATGCCCTCCACGCTCGAGGCCAGGGCCCTTCCCCAGGTTTCGGCCGTCGCCAAGCCGAGGGCGTGCTCCTCGTACCCGACCTTTGATCCCGCCACCGGCGAGGCTACCGAATTCATATTCTATGCCGACTCGACCGAGGAGCCTGTCGCTCCGTTCGCCGGTAGCGTGGTGGGGAAGTTGGCCAACCCCAACCTGGCCATTGCACGGATCGGAATCGCCGTCCGCGGAGATCTCGCGAAGGTCGTGACCAAGTGCTTCCCCGACGGCGGCGAAGAGGGACTCCGCACCCGCACGCACGGCGACTGGAGACGTCTCACCCTTGCCGGAGGCGAGGACGAA…
>MGG_13009_HN10-1604 886 HN10-1604_contig_1021_135217:101016-100131
ATGCGCACCCAGTTCTCTCTCCTCGGAGTCGCGGCTCTCGCCAGCACCGTCGTCAACGCCATGCCCTCCACGCTCGAGGCCAGGGCCCTTCCCCAGGTTTCGGCCGTCGCCAAGCCGAGGGCGTGCTCCTCGTACCCGACCTTTGATCCCGCCACCGGCGAGGCTACCGAATTCATATTCTATGCCGACTCGACCGAGGAGCCTGTCGCTCCGTTCGCCGGTAGCGTGGTGGGGAAGTTGGCCAACCCCAACCTGGCCATTGCACGGATCGGAATCGCCGTCCGCGGAGATCTCGCGAAGGTCGTGACCAAGTGCTTCCCCGACGGCGGCGAAGAGGGACTCCGCACCCGCACGCACGGCGACTGGAGACGTCTCACCCTTGCCGGAGGCGAGGACGAA…
>MGG_13009_JS-10-6-1-2 885 JS-10-6-1-2_contig_1093_91031:34177-35061
ATGCGCACCCAGTTCTCTCTCCTCGGAGTCGCGGCTCTCGCCAGCACCGTCGTCAACGCCATGCCCTCCACGCTCGAGGCCAGGGCCCTTCCCCAGGTTTCGGCCGTCGCCAAGCCGAGGGCGTGCTCCTCGTACCCGACCTTTGATCCCGCCACCGGCGAGGCTACCGAATTCATATTCTATGCCGACTCGACCGAGGAGCCTGTCGCTCCGTTCGCCGGTAGCGTGGTGGGGAAGTTGGCCAACCCCAACCTGGCCATTGCACGGATCGGAATCGCCGTCCGCGGAGATCTCGCGAAGGTCGTGACCAAGTGCTTCCCCGACGGCGGCGAAGAGGGACTCCGCACCCGCACGCACGGCGACTGGAGACGTCTCACCCTTGCCGGAGGCGAGGACGAA…
>MGG_13009_JS08-611 885 JS08-611_contig_998_91087:56902-56018
ATGCGCACCCAGTTCTCTCTCCTCGGAGTCGCGGCTCTCGCCAGCACCGTCGTCAACGCCATGCCCTCCACGCTCGAGGCCAGGGCCCTTCCCCAGGTTTCGGCCGTCGCCAAGCCGAGGGCGTGCTCCTCGTACCCGACCTTTGATCCCGCCACCGGCGAGGCTACCGAATTCATATTCTATGCCGACTCGACCGAGGAGCCTGTCGCTCCGTTCGCCGGTAGCGTGGTGGGGAAGTTGGCCAACCCCAACCTGGCCATTGCACGGATCGGAATCGCCGTCCGCGGAGATCTCGCGAAGGTCGTGACCAAGTGCTTCCCCGACGGCGGCGAAGAGGGACTCCGCACCCGCACGCACGGCGACTGGAGACGTCTCACCCTTGCCGGAGGCGAGGACGAA…
>MGG_13009_JS09-138 885 JS09-138_contig_1843_91063:34181-35065
ATGCGCACCCAGTTCTCTCTCCTCGGAGTCGCGGCTCTCGCCAGCACCGTCGTCAACGCCATGCCCTCCACGCTCGAGGCCAGGGCCCTTCCCCAGGTTTCGGCCGTCGCCAAGCCGAGGGCGTGCTCCTCGTACCCGACCTTTGATCCCGCCACCGGCGAGGCTACCGAATTCATATTCTATGCCGACTCGACCGAGGAGCCTGTCGCTCCGTTCGCCGGTAGCGTGGTGGGGAAGTTGGCCAACCCCAACCTGGCCATTGCACGGATCGGAATCGCCGTCCGCGGAGATCTCGCGAAGGTCGTGACCAAGTGCTTCCCCGACGGCGGCGAAGAGGGACTCCGCACCCGCACGCACGGCGACTGGAGACGTCTCACCCTTGCCGGAGGCGAGGACGAA…
>MGG_13009_JX-09Z116-1 885 JX-09Z116-1_contig_635_50222:34208-35092
ATGCGCACCCAGTTCTCTCTCCTCGGAGTCGCGGCTCTCGCCAGCACCGTCGTCAACGCCATGCCCTCCACGCTCGAGGCCAGGGCCCTTCCCCAGGTTTCGGCCGTCGCCAAGCCGAGGGCGTGCTCCTCGTACCCGACCTTTGATCCCGCCACCGGCGAGGCTACCGAATTCATATTCTATGCCGACTCGACCGAGGAGCCTGTCGCTCCGTTCGCCGGTAGCGTGGTGGGGAAGTTGGCCAACCCCAACCTGGCCATTGCACGGATCGGAATCGCCGTCCGCGGAGATCTCGCGAAGGTCGTGACCAAGTGCTTCCCCGACGGCGGCGAAGAGGGACTCCGCACCCGCACGCACGGCGACTGGAGACGTCTCACCCTTGCCGGAGGCGAGGACGAA…
>MGG_13009_JX10-102 885 JX10-102_contig_1155_91143:34189-35073
ATGCGCACCCAGTTCTCTCTCCTCGGAGTCGCGGCTCTCGCCAGCACCGTCGTCAACGCCATGCCCTCCACGCTCGAGGCCAGGGCCCTTCCCCAGGTTTCGGCCGTCGCCAAGCCGAGGGCGTGCTCCTCGTACCCGACCTTTGATCCCGCCACCGGCGAGGCTACCGAATTCATATTCTATGCCGACTCGACCGAGGAGCCTGTCGCTCCGTTCGCCGGTAGCGTGGTGGGGAAGTTGGCCAACCCCAACCTGGCCATTGCACGGATCGGAATCGCCGTCCGCGGAGATCTCGCGAAGGTCGTGACCAAGTGCTTCCCCGACGGCGGCGAAGAGGGACTCCGCACCCGCACGCACGGCGACTGGAGACGTCTCACCCTTGCCGGAGGCGAGGACGAA…
>MGG_13009_JX11-141 885 JX11-141_contig_1445_81454:47265-46382
ATGCGCACCCAGTTCTCTCTCCTCGGAGTCGCGGCTCTCGCCAGCACCGTCGTCAACGCCATGCCCTCCACGCTCGAGGCCAGGGCCCTTCCCCAGGTTTCGGCCGTCGCCAAGCCGAGGGCGTGCTCCTCGTACCCGACCTTTGATCCCGCCACCGGCGAGGCTACCGAATTCATATTCTATGCCGACTCGACCGAGGAGCCTGTCGCTCCGTTCGCCGGTAGCGTGGTGGGGAAGTTGGCCAACCCCAACCTGGCCATTGCACGGATCGGAATCGCCGTCCGCGGAGATCTCGCGAAGGTCGTGACCAAGTGCTTCCCCGACGGCGGCGAAGAGGGACTCCGCACCCGCACGCACGGCGACTGGAGACGTCTCACCCTTGCCGGAGGCGAGGACGAA…
>MGG_13009_KA1-3-1 886 KA1-3-1_contig_597_141121:66448-65563
ATGCGCACCCAGTTCTCTCTCCTCGGAGTCGCGGCTCTCGCCAGCACCGTCGTCAACGCCATGCCCTCCACGCTCGAGGCCAGGGCCCTTCCCCAGGTTTCGGCCGTCGCCAAGCCGAGGGCGTGCTCCTCGTACCCGACCTTTGATCCCGCCACCGGCGAGGCTACCGAATTCATATTCTATGCCGACTCGACCGAGGAGCCTGTCGCTCCGTTCGCCGGTAGCGTGGTGGGGAAGTTGGCCAACCCCAACCTGGCCATTGCACGGATCGGAATCGCCGTCCGCGGAGATCTCGCGAAGGTCGTGACCAAGTGCTTCCCCGACGGCGGCGAAGAGGGACTCCGCACCCGCACGCACGGCGACTGGAGACGTCTCACCCTTGCCGGAGGCGAGGACGAA…
>MGG_13009_KA2-1-1 885 KA2-1-1_contig_1224_78651:21786-22670
ATGCGCACCCAGTTCTCTCTCCTCGGAGTCGCGGCTCTCGCCAGCACCGTCGTCAACGCCATGCCCTCCACGCTCGAGGCCAGGGCCCTTCCCCAGGTTTCGGCCGTCGCCAAGCCGAGGGCGTGCTCCTCGTACCCGACCTTTGATCCCGCCACCGGCGAGGCTACCGAATTCATATTCTATGCCGACTCGACCGAGGAGCCTGTCGCTCCGTTCGCCGGTAGCGTGGTGGGGAAGTTGGCCAACCCCAACCTGGCCATTGCACGGATCGGAATCGCCGTCCGCGGAGATCTCGCGAAGGTCGTGACCAAGTGCTTCCCCGACGGCGGCGAAGAGGGACTCCGCACCCGCACGCACGGCGACTGGAGACGTCTCACCCTTGCCGGAGGCGAGGACGAA…
>MGG_13009_MG01_contig 885 MG01_contig_2514_2527:367-1251
ATGCGCACCCAGTTCTCTCTCCTCGGAGTCGCGGCTCTCGCCAGCACCGTCGTCAACGCCATGCCCTCCACGCTCGAGGCCAGGGCCCTTCCCCAGGTTTCGGCCGTCGCCAAGCCGAGGGCGTGCTCCTCGTACCCGACCTTTGATCCCGCCACCGGCGAGGCTACCGAATTCATATTCTATGCCGACTCGACCGAGGAGCCTGTCGCTCCGTTCGCCGGTAGCGTGGTGGGGAAGTTGGCCAACCCCAACCTGGCCATTGCACGGATCGGAATCGCCGTCCGCGGAGATCTCGCGAAGGTCGTGACCAAGTGCTTCCCCGACGGCGGCGAAGAGGGACTCCGCACCCGCACGCACGGCGACTGGAGACGTCTCACCCTTGCCGGAGGCGAGGACGAA…
>MGG_13009_Nich-2-3-2 885 Nich-2-3-2_contig_1169_37727:15963-15079
ATGCGCACCCAGTTCTCTCTCCTCGGAGTCGCGGCTCTCGCCAGCACCGTCGTCAACGCCATGCCCTCCACGCTCGAGGCCAGGGCCCTTCCCCAGGTTTCGGCCGTCGCCAAGCCGAGGGCGTGCTCCTCGTACCCGACCTTTGATCCCGCCACCGGCGAGGCTACCGAATTCATATTCTATGCCGACTCGACCGAGGAGCCTGTCGCTCCGTTCGCCGGTAGCGTGGTGGGGAAGTTGGCCAACCCCAACCTGGCCATTGCACGGATCGGAATCGCCGTCCGCGGAGATCTCGCGAAGGTCGTGACCAAGTGCTTCCCCGACGGCGGCGAAGAGGGACTCCGCACCCGCACGCACGGCGACTGGAGACGTCTCACCCTTGCCGGAGGCGAGGACGAA…
>MGG_13009_Nich-2-7-4 885 Nich-2-7-4_contig_1178_37735:15972-15088
ATGCGCACCCAGTTCTCTCTCCTCGGAGTCGCGGCTCTCGCCAGCACCGTCGTCAACGCCATGCCCTCCACGCTCGAGGCCAGGGCCCTTCCCCAGGTTTCGGCCGTCGCCAAGCCGAGGGCGTGCTCCTCGTACCCGACCTTTGATCCCGCCACCGGCGAGGCTACCGAATTCATATTCTATGCCGACTCGACCGAGGAGCCTGTCGCTCCGTTCGCCGGTAGCGTGGTGGGGAAGTTGGCCAACCCCAACCTGGCCATTGCACGGATCGGAATCGCCGTCCGCGGAGATCTCGCGAAGGTCGTGACCAAGTGCTTCCCCGACGGCGGCGAAGAGGGACTCCGCACCCGCACGCACGGCGACTGGAGACGTCTCACCCTTGCCGGAGGCGAGGACGAA…
>MGG_13009_P131_contig 885 gi|401806145|gb|AHZT01000975.1|_50202:15965-15081
ATGCGCACCCAGTTCTCTCTCCTCGGAGTCGCGGCTCTCGCCAGCACCGTCGTCAACGCCATGCCCTCCACGCTCGAGGCCAGGGCCCTTCCCCAGGTTTCGGCCGTCGCCAAGCCGAGGGCGTGCTCCTCGTACCCGACCTTTGATCCCGCCACCGGCGAGGCTACCGAATTCATATTCTATGCCGACTCGACCGAGGAGCCTGTCGCTCCGTTCGCCGGTAGCGTGGTGGGGAAGTTGGCCAACCCCAACCTGGCCATTGCACGGATCGGAATCGCCGTCCGCGGAGATCTCGCGAAGGTCGTGACCAAGTGCTTCCCCGACGGCGGCGAAGAGGGACTCCGCACCCGCACGCACGGCGACTGGAGACGTCTCACCCTTGCCGGAGGCGAGGACGAA…
>MGG_13009_PgKY_contig 885 PgKY_NODE_3429_length_19185_cov_16.619026_19259:16720-15836
ATGCGCACCCAGTTCTCTCTCCTCGGAGTCGCGGCTCTCGCCAGCACCGTCGTCAACGCCATGCCCTCCACGCTCGAGGCCAGGGCCCTTCCCCAGGTTTCGGCCGTCGCCAAGCCGAGGGCGTGCTCCTCGTACCCGACCTTTGATCCCGCCACCGGCGAGGCTACCGAATTCATATTCTATGCCGACTCGACCGAGGAGCCTGTCGCTCCGTTCGCCGGTAGCGTGGTGGGGAAGTTGGCCAACCCCAACCTGGCCATTGCACGGATCGGAATCGCCGTCCGCGGAGATCTCGCGAAGGTCGTGACCAAGTGCTTCCCCGACGGCGGCGAAGAGGGACTCCGCACCCGCACGCACGGCGACTGGAGGCGTCTCACCCTTGCCGGAGGCGAGGACGAA…
>MGG_13009_PGPA_contig 885 PGPA_NODE_3805_length_51060_cov_15.365981_51134:16731-15847
ATGCGCACCCAGTTCTCTCTCCTCGGAGTCGCGGCTCTCGCCAGCACCGTCGTCAACGCCATGCCCTCCACGCTCGAGGCCAGGGCCCTTCCCCAGGTTTCGGCCGTCGCCAAGCCGAGGGCGTGCTCCTCGTACCCGACCTTTGATCCCGCCACCGGCGAGGCTACCGAATTCATATTCTATGCCGACTCGACCGAGGAGCCTGTCGCTCCGTTCGCCGGTAGCGTGGTGGGGAAGTTGGCCAACCCCAACCTGGCCATTGCACGGATCGGAATCGCCGTCCGCGGAGATCTCGCGAAGGTCGTGACCAAGTGCTTCCCCGACGGCGGCGAAGAGGGACTCCGCACCCGCACGCACGGCGACTGGAGGCGTCTCACCCTTGCCGGAGGCGAGGACGAA…
>MGG_13009_PH14_contig 886 PH14-rn_scaffold00012_760197:370350-369465
ATGCGCACCCAGTTCTCTCTCCTCGGAGTCGCGGCTCTCGCCAGCACCGTCGTCAACGCCATGCCCTCCACGCTCGAGGCCAGGGCCCTTCCCCAGGTTTCGGCCGTCGCCAAGCCGAGGGCGTGCTCCTCGTACCCGACCTTTGATCCCGCCACCGGCGAGGCTACCGAATTCATATTCTATGCCGACTCGACCGAGGAGCCTGTCGCTCCGTTCGCCGGTAGCGTGGTGGGGAAGTTGGCCAACCCCAACCTGGCCATTGCACGGATCGGAATCGCCGTCCGCGGAGATCTCGCGAAGGTCGTGACCAAGTGCTTCCCCGACGGCGGCGAAGAGGGACTCCGCACCCGCACGCACGGCGACTGGAGACGTCTCACCCTTGCCGGAGGCGAGGACGAA…
>MGG_13009_PY0925_contig 885 PY0925_NODE_2617_length_184781_cov_14.451150_184855:64902-65786
ATGCGCACCCAGTTCTCTCTCCTCGGAGTCGCGGCTCTCGCCAGCACCGTCGTCAACGCCATGCCCTCCACGCTCGAGGCCAGGGCCCTTCCCCAGGTTTCGGCCGTCGCCAAGCCGAGGGCGTGCTCCTCGTACCCGACCTTTGATCCCGCCACCGGCGAGGCTACCGAATTCATATTCTATGCCGACTCGACCGAGGAGCCTGTCGCTCCGTTCGCCGGTAGCGTGGTGGGGAAGTTGGCCAACCCCAACCTGGCCATTGCACGGATCGGAATCGCCGTCCGCGGAGATCTCGCGAAGGTCGTGACCAAGTGCTTCCCCGACGGCGGCGAAGAGGGACTCCGCACCCGCACGCACGGCGACTGGAGGCGTCTCACCCTTGCCGGAGGCGAGGACGAA…
>MGG_13009_PY36.1_v2_contig 885 PY36_NODE_1145_length_185030_cov_14.701578_185104:120152-119268
ATGCGCACCCAGTTCTCTCTCCTCGGAGTCGCGGCTCTCGCCAGCACCGTCGTCAACGCCATGCCCTCCACGCTCGAGGCCAGGGCCCTTCCCCAGGTTTCGGCCGTCGCCAAGCCGAGGGCGTGCTCCTCGTACCCGACCTTTGATCCCGCCACCGGCGAGGCTACCGAATTCATATTCTATGCCGACTCGACCGAGGAGCCTGTCGCTCCGTTCGCCGGTAGCGTGGTGGGGAAGTTGGCCAACCCCAACCTGGCCATTGCACGGATCGGAATCGCCGTCCGCGGAGATCTCGCGAAGGTCGTGACCAAGTGCTTCCCCGACGGCGGCGAAGAGGGACTCCGCACCCGCACGCACGGCGACTGGAGGCGTCTCACCCTTGCCGGAGGCGAGGACGAA…
>MGG_13009_PY5003_v2_contig 885 PY5003_NODE_3714_length_82303_cov_7.226845_82377:16819-15935
ATGCGCACCCAGTTCTCTCTCCTCGGAGTCGCGGCTCTCGCCAGCACCGTCGTCAACGCCATGCCCTCCACGCTCGAGGCCAGGGCCCTTCCCCAGGTTTCGGCCGTCGCCAAGCCGAGGGCGTGCTCCTCGTACCCGACCTTTGATCCCGCCACCGGCGAGGCTACCGAATTCATATTCTATGCCGACTCGACCGAGGAGCCTGTCGCTCCGTTCGCCGGTAGCGTGGTGGGGAAGTTGGCCAACCCCAACCTGGCCATTGCACGGATCGGAATCGCCGTCCGCGGAGATCTCGCGAAGGTCGTGACCAAGTGCTTCCCCGACGGCGGCGAAGAGGGACTCCGCACCCGCACGCACGGCGACTGGAGGCGTCTCACCCTTGCCGGAGGCGAGGACGAA…
>MGG_13009_PY5010_contig 885 PY5010_NODE_3213_length_81470_cov_14.871057_81544:16632-15748
ATGCGCACCCAGTTCTCTCTCCTCGGAGTCGCGGCTCTCGCCAGCACCGTCGTCAACGCCATGCCCTCCACGCTCGAGGCCAGGGCCCTTCCCCAGGTTTCGGCCGTCGCCAAGCCGAGGGCGTGCTCCTCGTACCCGACCTTTGATCCCGCCACCGGCGAGGCTACCGAATTCATATTCTATGCCGACTCGACCGAGGAGCCTGTCGCTCCGTTCGCCGGTAGCGTGGTGGGGAAGTTGGCCAACCCCAACCTGGCCATTGCACGGATCGGAATCGCCGTCCGCGGAGATCTCGCGAAGGTCGTGACCAAGTGCTTCCCCGACGGCGGCGAAGAGGGACTCCGCACCCGCACGCACGGCGACTGGAGGCGTCTCACCCTTGCCGGAGGCGAGGACGAA…
>MGG_13009_PY6017_v2_contig 885 PY6017_NODE_3684_length_213362_cov_14.449237_213436:196758-197642
ATGCGCACCCAGTTCTCTCTCCTCGGAGTCGCGGCTCTCGCCAGCACCGTCGTCAACGCCATGCCCTCCACGCTCGAGGCCAGGGCCCTTCCCCAGGTTTCGGCCGTCGCCAAGCCGAGGGCGTGCTCCTCGTACCCGACCTTTGATCCCGCCACCGGCGAGGCTACCGAATTCATATTCTATGCCGACTCGACCGAGGAGCCTGTCGCTCCGTTCGCCGGTAGCGTGGTGGGGAAGTTGGCCAACCCCAACCTGGCCATTGCACGGATCGGAATCGCCGTCCGCGGAGATCTCGCGAAGGTCGTGACCAAGTGCTTCCCCGACGGCGGCGAAGAGGGACTCCGCACCCGCACGCACGGCGACTGGAGGCGTCTCACCCTTGCCGGAGGCGAGGACGAA…
>MGG_13009_PY6025_contig 495 Tag PY6025_NODE_43873_length_421_cov_4.593824_495:1-495
GCCGTCGCCAAGCCGAGGGCGTGCTCCTCGTACCCGACCTTTGATCCCGCCACCGGCGAGGCTACCGAATTCATATTCTATGCCGACTCGACCGAGGAGCCTGTCGCTCCGTTCGCCGGTAGCGTGGTGGGGAAGTTGGCCAACCCCAACCTGGCCATTGCACGGATCGGAATCGCCGTCCGCGGAGATCTCGCGAAGGTCGTGACCAAGTGCTTCCCCGACGGCGGCGAAGAGGGACTCCGCACCCGCACGCACGGCGACTGGAGGCGTCTCACCCTTGCCGGAGGCGAGGACGAAAACATCATCTTGATCGGCCAAGGTCCAGTGGCCCACCGACCCTTGACCCCCCACGATCACTTCTTCGCCAACGGCACGcag
>MGG_13009_PY6045_contig 885 PY6045_NODE_2182_length_81390_cov_14.821857_81464:64798-65682
ATGCGCACCCAGTTCTCTCTCCTCGGAGTCGCGGCTCTCGCCAGCACCGTCGTCAACGCCATGCCCTCCACGCTCGAGGCCAGGGCCCTTCCCCAGGTTTCGGCCGTCGCCAAGCCGAGGGCGTGCTCCTCGTACCCGACCTTTGATCCCGCCACCGGCGAGGCTACCGAATTCATATTCTATGCCGACTCGACCGAGGAGCCTGTCGCTCCGTTCGCCGGTAGCGTGGTGGGGAAGTTGGCCAACCCCAACCTGGCCATTGCACGGATCGGAATCGCCGTCCGCGGAGATCTCGCGAAGGTCGTGACCAAGTGCTTCCCCGACGGCGGCGAAGAGGGACTCCGCACCCGCACGCACGGCGACTGGAGGCGTCTCACCCTTGCCGGAGGCGAGGACGAA…
>MGG_13009_Ror1_contig 606 Tag Ror1_contig_302_91636bp_91636:34569-35174
TTTTTTTTCTTCTTTTTTTCCCCTGGTGGCTAGCATTGTACTCCCGTTTTGTGTAGTATAATAGGGGTAATTATGGCTAACATCGAGGGGCTACGTCGTCGATAGATCGGAATCGCCGTCCGCGGAGATCTCGCGAAGGTCGTGACCAAGTGCTTCCCCGACGGCGGCGAAGAGGGACTCCGCACCCGCACGCACGGCGACTGGAGACGTCTCACCCTTGCCGGAGGCGAGGACGAAAACATCATCTTGATCGGCCAAGGTCCAGTGGCCCACCGACCCTTGACCCCCCACGATCACTTCTTCGCCAACGGCACGCAGCAGCCCGGCGTCTTTATGGGCGACAACGGATCGACCACCTGGGCCTTCTCGAGGAAGGACGCCAGCGCCAGTGAGCCGTTC…
>MGG_13009_Ror1_contig 296 Tag Ror1_contig_302_91636bp_91636:34259-34554
ATGCGCACCCAGTTCTCTCTCCTCGGAGTCGCGGCTCTCGCCAGCACCGTCGTCAACGCCATGCCCTCCACGCTCGAGGCCAGGGCCCTTCCCCAGGTTTCGGCCGTCGCCAAGCCGAGGGCGTGCTCCTCGTACCCGACCTTTGATCCCGCCACCGGCGAGGCTACCGAATTCATATTCTATGCCGACTCGACCGAGGAGCCTGTCGCTCCGTTCGCCGGTAGCGTGGTGGGGAAGTTGGCCAACCCCAACCTGGCCATTGCACGGGTAAGCATACCTTTTTTTTTCTTCTTTTT
>MGG_13009_Sar-2-20-1 886 Sar-2-20-1_contig_1294_86587:84219-85104
ATGCGCACCCAGTTCTCTCTCCTCGGAGTCGCGGCTCTCGCCAGCACCGTCGTCAACGCCATGCCCTCCACGCTCGAGGCCAGGGCCCTTCCCCAGGTTTCGGCCGTCGCCAAGCCGAGGGCGTGCTCCTCGTACCCGACCTTTGATCCCGCCACCGGCGAGGCTACCGAATTCATATTCTATGCCGACTCGACCGAGGAGCCTGTCGCTCCGTTCGCCGGTAGCGTGGTGGGGAAGTTGGCCAACCCCAACCTGGCCATTGCACGGATCGGAATCGCCGTCCGCGGAGATCTCGCGAAGGTCGTGACCAAGTGCTTCCCCGACGGCGGCGAAGAGGGACTCCGCACCCGCACGCACGGCGACTGGAGACGTCTCACCCTTGCCGGAGGCGAGGACGAA…
>MGG_13009_Sar-AD3-5 885 Sar-AD3-5_contig_929_78594:56856-55972
ATGCGCACCCAGTTCTCTCTCCTCGGAGTCGCGGCTCTCGCCAGCACCGTCGTCAACGCCATGCCCTCCACGCTCGAGGCCAGGGCCCTTCCCCAGGTTTCGGCCGTCGCCAAGCCGAGGGCGTGCTCCTCGTACCCGACCTTTGATCCCGCCACCGGCGAGGCTACCGAATTCATATTCTATGCCGACTCGACCGAGGAGCCTGTCGCTCCGTTCGCCGGTAGCGTGGTGGGGAAGTTGGCCAACCCCAACCTGGCCATTGCACGGATCGGAATCGCCGTCCGCGGAGATCTCGCGAAGGTCGTGACCAAGTGCTTCCCCGACGGCGGCGAAGAGGGACTCCGCACCCGCACGCACGGCGACTGGAGACGTCTCACCCTTGCCGGAGGCGAGGACGAA…
>MGG_13009_SC-10-120-65-2 886 SC-10-120-65-2_contig_1048_346724:245618-246503
ATGCGCACCCAGTTCTCTCTCCTCGGAGTCGCGGCTCTCGCCAGCACCGTCGTCAACGCCATGCCCTCCACGCTCGAGGCCAGGGCCCTTCCCCAGGTTTCGGCCGTCGCCAAGCCGAGGGCGTGCTCCTCGTACCCGACCTTTGATCCCGCCACCGGCGAGGCTACCGAATTCATATTCTATGCCGACTCGACCGAGGAGCCTGTCGCTCCGTTCGCCGGTAGCGTGGTGGGGAAGTTGGCCAACCCCAACCTGGCCATTGCACGGATCGGAATCGCCGTCCGCGGAGATCTCGCGAAGGTCGTGACCAAGTGCTTCCCCGACGGCGGCGAAGAGGGACTCCGCACCCGCACGCACGGCGACTGGAGACGTCTCACCCTTGCCGGAGGCGAGGACGAA…
>MGG_13009_SC-10-25-44-1 886 SC-10-25-44-1_contig_1259_105322:102953-103838
ATGCGCACCCAGTTCTCTCTCCTCGGAGTCGCGGCTCTCGCCAGCACCGTCGTCAACGCCATGCCCTCCACGCTCGAGGCCAGGGCCCTTCCCCAGGTTTCGGCCGTCGCCAAGCCGAGGGCGTGCTCCTCGTACCCGACCTTTGATCCCGCCACCGGCGAGGCTACCGAATTCATATTCTATGCCGACTCGACCGAGGAGCCTGTCGCTCCGTTCGCCGGTAGCGTGGTGGGGAAGTTGGCCAACCCCAACCTGGCCATTGCACGGATCGGAATCGCCGTCCGCGGAGATCTCGCGAAGGTCGTGACCAAGTGCTTCCCCGACGGCGGCGAAGAGGGACTCCGCACCCGCACGCACGGCGACTGGAGACGTCTCACCCTTGCCGGAGGCGAGGACGAA…
>MGG_13009_SV9610_contig 886 SV9610_contig_51_77080bp_77080:74713-75598
ATGCGCACCCAGTTCTCTCTCCTCGGAGTCGCGGCTCTCGCCAGCACCGTCGTCAACGCCATGCCCTCCACGCTCGAGGCCAGGGCCCTTCCCCAGGTTTCGGCCGTCGCCAAGCCGAGGGCGTGCTCCTCGTACCCGACCTTTGATCCCGCCACCGGCGAGGCTACCGAATTCATATTCTATGCCGACTCGACCGAGGAGCCTGTCGCTCCGTTCGCCGGTAGCGTGGTGGGGAAGTTGGCCAACCCCAACCTGGCCATTGCACGGATCGGAATCGCCGTCCGCGGAGATCTCGCGAAGGTCGTGACCAAGTGCTTCCCCGACGGCGGCGAAGAGGGACTCCGCACCCGCACGCACGGCGACTGGAGACGTCTCACCCTTGCCGGAGGCGAGGACGAA…
>MGG_13009_SV9623_contig 885 SV9623_contig_349_67763bp_67763:34216-35100
ATGCGCACCCAGTTCTCTCTCCTCGGAGTCGCGGCTCTCGCCAGCACCGTCGTCAACGCCATGCCCTCCACGCTCGAGGCCAGGGCCCTTCCCCAGGTTTCGGCCGTCGCCAAGCCGAGGGCGTGCTCCTCGTACCCGACCTTTGATCCCGCCACCGGCGAGGCTACCGAATTCATATTCTATGCCGACTCGACCGAGGAGCCTGTCGCTCCGTTCGCCGGTAGCGTGGTGGGGAAGTTGGCCAACCCCAACCTGGCCATTGCACGGATCGGAATCGCCGTCCGCGGAGATCTCGCGAAGGTCGTGACCAAGTGCTTCCCCGACGGCGGCGAAGAGGGACTCCGCACCCGCACGCACGGCGACTGGAGACGTCTCACCCTTGCCGGAGGCGAGGACGAA…
>MGG_13009_TH12_contig 885 TH12-rn_scaffold00007_1466071:1077669-1076785
ATGCGCACCCAGTTCTCTCTCCTCGGAGTCGCGGCTCTCGCCAGCACCGTCGTCAACGCCATGCCCTCCACGCTCGAGGCCAGGGCCCTTCCCCAGGTTTCGGCCGTCGCCAAGCCGAGGGCGTGCTCCTCGTACCCGACCTTTGATCCCGCCACCGGCGAGGCTACCGAATTCATATTCTATGCCGACTCGACCGAGGAGCCTGTCGCTCCGTTCGCCGGTAGCGTGGTGGGGAAGTTGGCCAACCCCAACCTGGCCATTGCACGGATCGGAATCGCCGTCCGCGGAGATCTCGCGAAGGTCGTGACCAAGTGCTTCCCCGACGGCGGCGAAGAGGGACTCCGCACCCGCACGCACGGCGACTGGAGACGTCTCACCCTTGCCGGAGGCGAGGACGAA…
>MGG_13009_TH16_contig 885 TH16_scaffold00001_3133578:1385362-1384478
ATGCGCACCCAGTTCTCTCTCCTCGGAGTCGCGGCTCTCGCCAGCACCGTCGTCAACGCCATGCCCTCCACGCTCGAGGCCAGGGCCCTTCCCCAGGTTTCGGCCGTCGCCAAGCCGAGGGCGTGCTCCTCGTACCCGACCTTTGATCCCGCCACCGGCGAGGCTACCGAATTCATATTCTATGCCGACTCGACCGAGGAGCCTGTCGCTCCGTTCGCCGGTAGCGTGGTGGGGAAGTTGGCCAACCCCAACCTGGCCATTGCACGGATCGGAATCGCCGTCCGCGGAGATCTCGCGAAGGTCGTGACCAAGTGCTTCCCCGACGGCGGCGAAGAGGGACTCCGCACCCGCACGCACGGCGACTGGAGACGTCTCACCCTTGCCGGAGGCGAGGACGAA…
>MGG_13009_TW-1-1-1-B-1 885 TW-1-1-1-B-1_contig_1726_93424:56888-56004
ATGCGCACCCAGTTCTCTCTCCTCGGAGTCGCGGCTCTCGCCAGCACCGTCGTCAACGCCATGCCCTCCACGCTCGAGGCCAGGGCCCTTCCCCAGGTTTCGGCCGTCGCCAAGCCGAGGGCGTGCTCCTCGTACCCGACCTTTGATCCCGCCACCGGCGAGGCTACCGAATTCATATTCTATGCCGACTCGACCGAGGAGCCTGTCGCTCCGTTCGCCGGTAGCGTGGTGGGGAAGTTGGCCAACCCCAACCTGGCCATTGCACGGATCGGAATCGCCGTCCGCGGAGATCTCGCGAAGGTCGTGACCAAGTGCTTCCCCGACGGCGGCGAAGAGGGACTCCGCACCCGCACGCACGGCGACTGGAGACGTCTCACCCTTGCCGGAGGCGAGGACGAA…
>MGG_13009_TW-12CY-TB1-2 885 TW-12CY-TB1-2_contig_1856_151355:94453-95337
ATGCGCACCCAGTTCTCTCTCCTCGGAGTCGCGGCTCTCGCCAGCACCGTCGTCAACGCCATGCCCTCCACGCTCGAGGCCAGGGCCCTTCCCCAGGTTTCGGCCGTCGCCAAGCCGAGGGCGTGCTCCTCGTACCCGACCTTTGATCCCGCCACCGGCGAGGCTACCGAATTCATATTCTATGCCGACTCGACCGAGGAGCCTGTCGCTCCGTTCGCCGGTAGCGTGGTGGGGAAGTTGGCCAACCCCAACCTGGCCATTGCACGGATCGGAATCGCCGTCCGCGGAGATCTCGCGAAGGTCGTGACCAAGTGCTTCCCCGACGGCGGCGAAGAGGGACTCCGCACCCGCACGCACGGCGACTGGAGACGTCTCACCCTTGCCGGAGGCGAGGACGAA…
>MGG_13009_TW-12HL-DF1-2 885 TW-12HL-DF1-2_contig_1332_151311:56970-56086
ATGCGCACCCAGTTCTCTCTCCTCGGAGTCGCGGCTCTCGCCAGCACCGTCGTCAACGCCATGCCCTCCACGCTCGAGGCCAGGGCCCTTCCCCAGGTTTCGGCCGTCGCCAAGCCGAGGGCGTGCTCCTCGTACCCGACCTTTGATCCCGCCACCGGCGAGGCTACCGAATTCATATTCTATGCCGACTCGACCGAGGAGCCTGTCGCTCCGTTCGCCGGTAGCGTGGTGGGGAAGTTGGCCAACCCCAACCTGGCCATTGCACGGATCGGAATCGCCGTCCGCGGAGATCTCGCGAAGGTCGTGACCAAGTGCTTCCCCGACGGCGGCGAAGAGGGACTCCGCACCCGCACGCACGGCGACTGGAGACGTCTCACCCTTGCCGGAGGCGAGGACGAA…
>MGG_13009_TW-12HL-YL2-1 885 TW-12HL-YL2-1_contig_1090_262079:56887-56003
ATGCGCACCCAGTTCTCTCTCCTCGGAGTCGCGGCTCTCGCCAGCACCGTCGTCAACGCCATGCCCTCCACGCTCGAGGCCAGGGCCCTTCCCCAGGTTTCGGCCGTCGCCAAGCCGAGGGCGTGCTCCTCGTACCCGACCTTTGATCCCGCCACCGGCGAGGCTACCGAATTCATATTCTATGCCGACTCGACCGAGGAGCCTGTCGCTCCGTTCGCCGGTAGCGTGGTGGGGAAGTTGGCCAACCCCAACCTGGCCATTGCACGGATCGGAATCGCCGTCCGCGGAGATCTCGCGAAGGTCGTGACCAAGTGCTTCCCCGACGGCGGCGAAGAGGGACTCCGCACCCGCACGCACGGCGACTGGAGACGTCTCACCCTTGCCGGAGGCGAGGACGAA…
>MGG_13009_TW-12TD-RH1-1 885 TW-12TD-RH1-1_contig_1122_261993:205117-206001
ATGCGCACCCAGTTCTCTCTCCTCGGAGTCGCGGCTCTCGCCAGCACCGTCGTCAACGCCATGCCCTCCACGCTCGAGGCCAGGGCCCTTCCCCAGGTTTCGGCCGTCGCCAAGCCGAGGGCGTGCTCCTCGTACCCGACCTTTGATCCCGCCACCGGCGAGGCTACCGAATTCATATTCTATGCCGACTCGACCGAGGAGCCTGTCGCTCCGTTCGCCGGTAGCGTGGTGGGGAAGTTGGCCAACCCCAACCTGGCCATTGCACGGATCGGAATCGCCGTCCGCGGAGATCTCGCGAAGGTCGTGACCAAGTGCTTCCCCGACGGCGGCGAAGAGGGACTCCGCACCCGCACGCACGGCGACTGGAGACGTCTCACCCTTGCCGGAGGCGAGGACGAA…
>MGG_13009_TW-12TN-HB2-2 885 TW-12TN-HB2-2_contig_1343_152947:96083-96967
ATGCGCACCCAGTTCTCTCTCCTCGGAGTCGCGGCTCTCGCCAGCACCGTCGTCAACGCCATGCCCTCCACGCTCGAGGCCAGGGCCCTTCCCCAGGTTTCGGCCGTCGCCAAGCCGAGGGCGTGCTCCTCGTACCCGACCTTTGATCCCGCCACCGGCGAGGCTACCGAATTCATATTCTATGCCGACTCGACCGAGGAGCCTGTCGCTCCGTTCGCCGGTAGCGTGGTGGGGAAGTTGGCCAACCCCAACCTGGCCATTGCACGGATCGGAATCGCCGTCCGCGGAGATCTCGCGAAGGTCGTGACCAAGTGCTTCCCCGACGGCGGCGAAGAGGGACTCCGCACCCGCACGCACGGCGACTGGAGACGTCTCACCCTTGCCGGAGGCGAGGACGAA…
>MGG_13009_TW-12YL-DL3-2 885 TW-12YL-DL3-2_contig_14_302432:245583-246467
ATGCGCACCCAGTTCTCTCTCCTCGGAGTCGCGGCTCTCGCCAGCACCGTCGTCAACGCCATGCCCTCCACGCTCGAGGCCAGGGCCCTTCCCCAGGTTTCGGCCGTCGCCAAGCCGAGGGCGTGCTCCTCGTACCCGACCTTTGATCCCGCCACCGGCGAGGCTACCGAATTCATATTCTATGCCGACTCGACCGAGGAGCCTGTCGCTCCGTTCGCCGGTAGCGTGGTGGGGAAGTTGGCCAACCCCAACCTGGCCATTGCACGGATCGGAATCGCCGTCCGCGGAGATCTCGCGAAGGTCGTGACCAAGTGCTTCCCCGACGGCGGCGAAGAGGGACTCCGCACCCGCACGCACGGCGACTGGAGACGTCTCACCCTTGCCGGAGGCGAGGACGAA…
>MGG_13009_TW-12YL-DP1-1 885 TW-12YL-DP1-1_contig_1513_151246:56875-55991
ATGCGCACCCAGTTCTCTCTCCTCGGAGTCGCGGCTCTCGCCAGCACCGTCGTCAACGCCATGCCCTCCACGCTCGAGGCCAGGGCCCTTCCCCAGGTTTCGGCCGTCGCCAAGCCGAGGGCGTGCTCCTCGTACCCGACCTTTGATCCCGCCACCGGCGAGGCTACCGAATTCATATTCTATGCCGACTCGACCGAGGAGCCTGTCGCTCCGTTCGCCGGTAGCGTGGTGGGGAAGTTGGCCAACCCCAACCTGGCCATTGCACGGATCGGAATCGCCGTCCGCGGAGATCTCGCGAAGGTCGTGACCAAGTGCTTCCCCGACGGCGGCGAAGAGGGACTCCGCACCCGCACGCACGGCGACTGGAGACGTCTCACCCTTGCCGGAGGCGAGGACGAA…
>MGG_13009_TW-12YL-TT4-1 885 TW-12YL-TT4-1_contig_1371_91059:34190-35074
ATGCGCACCCAGTTCTCTCTCCTCGGAGTCGCGGCTCTCGCCAGCACCGTCGTCAACGCCATGCCCTCCACGCTCGAGGCCAGGGCCCTTCCCCAGGTTTCGGCCGTCGCCAAGCCGAGGGCGTGCTCCTCGTACCCGACCTTTGATCCCGCCACCGGCGAGGCTACCGAATTCATATTCTATGCCGACTCGACCGAGGAGCCTGTCGCTCCGTTCGCCGGTAGCGTGGTGGGGAAGTTGGCCAACCCCAACCTGGCCATTGCACGGATCGGAATCGCCGTCCGCGGAGATCTCGCGAAGGTCGTGACCAAGTGCTTCCCCGACGGCGGCGAAGAGGGACTCCGCACCCGCACGCACGGCGACTGGAGACGTCTCACCCTTGCCGGAGGCGAGGACGAA…
>MGG_13009_TW-2-7-2-A-1 885 TW-2-7-2-A-1_contig_1472_302591:56856-55972
ATGCGCACCCAGTTCTCTCTCCTCGGAGTCGCGGCTCTCGCCAGCACCGTCGTCAACGCCATGCCCTCCACGCTCGAGGCCAGGGCCCTTCCCCAGGTTTCGGCCGTCGCCAAGCCGAGGGCGTGCTCCTCGTACCCGACCTTTGATCCCGCCACCGGCGAGGCTACCGAATTCATATTCTATGCCGACTCGACCGAGGAGCCTGTCGCTCCGTTCGCCGGTAGCGTGGTGGGGAAGTTGGCCAACCCCAACCTGGCCATTGCACGGATCGGAATCGCCGTCCGCGGAGATCTCGCGAAGGTCGTGACCAAGTGCTTCCCCGACGGCGGCGAAGAGGGACTCCGCACCCGCACGCACGGCGACTGGAGACGTCTCACCCTTGCCGGAGGCGAGGACGAA…
>MGG_13009_TW-6-2-2-B-1 885 TW-6-2-2-B-1_contig_968_302614:56921-56037
ATGCGCACCCAGTTCTCTCTCCTCGGAGTCGCGGCTCTCGCCAGCACCGTCGTCAACGCCATGCCCTCCACGCTCGAGGCCAGGGCCCTTCCCCAGGTTTCGGCCGTCGCCAAGCCGAGGGCGTGCTCCTCGTACCCGACCTTTGATCCCGCCACCGGCGAGGCTACCGAATTCATATTCTATGCCGACTCGACCGAGGAGCCTGTCGCTCCGTTCGCCGGTAGCGTGGTGGGGAAGTTGGCCAACCCCAACCTGGCCATTGCACGGATCGGAATCGCCGTCCGCGGAGATCTCGCGAAGGTCGTGACCAAGTGCTTCCCCGACGGCGGCGAAGAGGGACTCCGCACCCGCACGCACGGCGACTGGAGACGTCTCACCCTTGCCGGAGGCGAGGACGAA…
>MGG_13009_TW-6-43-1 885 TW-6-43-1_contig_1168_262195:56979-56095
ATGCGCACCCAGTTCTCTCTCCTCGGAGTCGCGGCTCTCGCCAGCACCGTCGTCAACGCCATGCCCTCCACGCTCGAGGCCAGGGCCCTTCCCCAGGTTTCGGCCGTCGCCAAGCCGAGGGCGTGCTCCTCGTACCCGACCTTTGATCCCGCCACCGGCGAGGCTACCGAATTCATATTCTATGCCGACTCGACCGAGGAGCCTGTCGCTCCGTTCGCCGGTAGCGTGGTGGGGAAGTTGGCCAACCCCAACCTGGCCATTGCACGGATCGGAATCGCCGTCCGCGGAGATCTCGCGAAGGTCGTGACCAAGTGCTTCCCCGACGGCGGCGAAGAGGGACTCCGCACCCGCACGCACGGCGACTGGAGACGTCTCACCCTTGCCGGAGGCGAGGACGAA…
>MGG_13009_TW-CYBP1-3 885 TW-CYBP1-3_contig_1252_57289:56872-55988
ATGCGCACCCAGTTCTCTCTCCTCGGAGTCGCGGCTCTCGCCAGCACCGTCGTCAACGCCATGCCCTCCACGCTCGAGGCCAGGGCCCTTCCCCAGGTTTCGGCCGTCGCCAAGCCGAGGGCGTGCTCCTCGTACCCGACCTTTGATCCCGCCACCGGCGAGGCTACCGAATTCATATTCTATGCCGACTCGACCGAGGAGCCTGTCGCTCCGTTCGCCGGTAGCGTGGTGGGGAAGTTGGCCAACCCCAACCTGGCCATTGCACGGATCGGAATCGCCGTCCGCGGAGATCTCGCGAAGGTCGTGACCAAGTGCTTCCCCGACGGCGGCGAAGAGGGACTCCGCACCCGCACGCACGGCGACTGGAGACGTCTCACCCTTGCCGGAGGCGAGGACGAA…
>MGG_13009_TW-PT1-1 885 TW-PT1-1_contig_656_110564:16159-15275
ATGCGCACCCAGTTCTCTCTCCTCGGAGTCGCGGCTCTCGCCAGCACCGTCGTCAACGCCATGCCCTCCACGCTCGAGGCCAGGGCCCTTCCCCAGGTTTCGGCCGTCGCCAAGCCGAGGGCGTGCTCCTCGTACCCGACCTTTGATCCCGCCACCGGCGAGGCTACCGAATTCATATTCTATGCCGACTCGACCGAGGAGCCTGTCGCTCCGTTCGCCGGTAGCGTGGTGGGGAAGTTGGCCAACCCCAACCTGGCCATTGCACGGATCGGAATCGCCGTCCGCGGAGATCTCGCGAAGGTCGTGACCAAGTGCTTCCCCGACGGCGGCGAAGAGGGACTCCGCACCCGCACGCACGGCGACTGGAGACGTCTCACCCTTGCCGGAGGCGAGGACGAA…
>MGG_13009_TW-PT3-1 885 TW-PT3-1_contig_1473_264284:74644-75528
ATGCGCACCCAGTTCTCTCTCCTCGGAGTCGCGGCTCTCGCCAGCACCGTCGTCAACGCCATGCCCTCCACGCTCGAGGCCAGGGCCCTTCCCCAGGTTTCGGCCGTCGCCAAGCCGAGGGCGTGCTCCTCGTACCCGACCTTTGATCCCGCCACCGGCGAGGCTACCGAATTCATATTCTATGCCGACTCGACCGAGGAGCCTGTCGCTCCGTTCGCCGGTAGCGTGGTGGGGAAGTTGGCCAACCCCAACCTGGCCATTGCACGGATCGGAATCGCCGTCCGCGGAGATCTCGCGAAGGTCGTGACCAAGTGCTTCCCCGACGGCGGCGAAGAGGGACTCCGCACCCGCACGCACGGCGACTGGAGACGTCTCACCCTTGCCGGAGGCGAGGACGAA…
>MGG_13009_TW-PT6-1 885 TW-PT6-1_contig_1802_260094:205136-206020
ATGCGCACCCAGTTCTCTCTCCTCGGAGTCGCGGCTCTCGCCAGCACCGTCGTCAACGCCATGCCCTCCACGCTCGAGGCCAGGGCCCTTCCCCAGGTTTCGGCCGTCGCCAAGCCGAGGGCGTGCTCCTCGTACCCGACCTTTGATCCCGCCACCGGCGAGGCTACCGAATTCATATTCTATGCCGACTCGACCGAGGAGCCTGTCGCTCCGTTCGCCGGTAGCGTGGTGGGGAAGTTGGCCAACCCCAACCTGGCCATTGCACGGATCGGAATCGCCGTCCGCGGAGATCTCGCGAAGGTCGTGACCAAGTGCTTCCCCGACGGCGGCGAAGAGGGACTCCGCACCCGCACGCACGGCGACTGGAGACGTCTCACCCTTGCCGGAGGCGAGGACGAA…
>MGG_13009_TW-TN4-2 885 TW-TN4-2_contig_295_262017:56878-55994
ATGCGCACCCAGTTCTCTCTCCTCGGAGTCGCGGCTCTCGCCAGCACCGTCGTCAACGCCATGCCCTCCACGCTCGAGGCCAGGGCCCTTCCCCAGGTTTCGGCCGTCGCCAAGCCGAGGGCGTGCTCCTCGTACCCGACCTTTGATCCCGCCACCGGCGAGGCTACCGAATTCATATTCTATGCCGACTCGACCGAGGAGCCTGTCGCTCCGTTCGCCGGTAGCGTGGTGGGGAAGTTGGCCAACCCCAACCTGGCCATTGCACGGATCGGAATCGCCGTCCGCGGAGATCTCGCGAAGGTCGTGACCAAGTGCTTCCCCGACGGCGGCGAAGAGGGACTCCGCACCCGCACGCACGGCGACTGGAGACGTCTCACCCTTGCCGGAGGCGAGGACGAA…
>MGG_13009_WD-3-1 886 WD-3-1_contig_603_96293:2376-1491
ATGCGCACCCAGTTCTCTCTCCTCGGAGTCGCGGCTCTCGCCAGCACCGTCGTCAACGCCATGCCCTCCACGCTCGAGGCCAGGGCCCTTCCCCAGGTTTCGGCCGTCGCCAAGCCGAGGGCGTGCTCCTCGTACCCGACCTTTGATCCCGCCACCGGCGAGGCTACCGAATTCATATTCTATGCCGACTCGACCGAGGAGCCTGTCGCTCCGTTCGCCGGTAGCGTGGTGGGGAAGTTGGCCAACCCCAACCTGGCCATTGCACGGATCGGAATCGCCGTCCGCGGAGATCTCGCGAAGGTCGTGACCAAGTGCTTCCCCGACGGCGGCGAAGAGGGACTCCGCACCCGCACGCACGGCGACTGGAGACGTCTCACCCTTGCCGGAGGCGAGGACGAA…
>MGG_13009_Y34_contig 885 gi|401804811|gb|AHZS01001165.1|_110323:94372-95256
ATGCGCACCCAGTTCTCTCTCCTCGGAGTCGCGGCTCTCGCCAGCACCGTCGTCAACGCCATGCCCTCCACGCTCGAGGCCAGGGCCCTTCCCCAGGTTTCGGCCGTCGCCAAGCCGAGGGCGTGCTCCTCGTACCCGACCTTTGATCCCGCCACCGGCGAGGCTACCGAATTCATATTCTATGCCGACTCGACCGAGGAGCCTGTCGCTCCGTTCGCCGGTAGCGTGGTGGGGAAGTTGGCCAACCCCAACCTGGCCATTGCACGGATCGGAATCGCCGTCCGCGGAGATCTCGCGAAGGTCGTGACCAAGTGCTTCCCCGACGGCGGCGAAGAGGGACTCCGCACCCGCACGCACGGCGACTGGAGACGTCTCACCCTTGCCGGAGGCGAGGACGAA…
>MGG_13009_YN07205e 886 YN07205e_contig_879_195413:94378-95263
ATGCGCACCCAGTTCTCTCTCCTCGGAGTCGCGGCTCTCGCCAGCACCGTCGTCAACGCCATGCCCTCCACGCTCGAGGCCAGGGCCCTTCCCCAGGTTTCGGCCGTCGCCAAGCCGAGGGCGTGCTCCTCGTACCCGACCTTTGATCCCGCCACCGGCGAGGCTACCGAATTCATATTCTATGCCGACTCGACCGAGGAGCCTGTCGCTCCGTTCGCCGGTAGCGTGGTGGGGAAGTTGGCCAACCCCAACCTGGCCATTGCACGGATCGGAATCGCCGTCCGCGGAGATCTCGCGAAGGTCGTGACCAAGTGCTTCCCCGACGGCGGCGAAGAGGGACTCCGCACCCGCACGCACGGCGACTGGAGACGTCTCACCCTTGCCGGAGGCGAGGACGAA…
>MGG_13009_YN072310 885 YN072310_contig_652_151335:56949-56065
ATGCGCACCCAGTTCTCTCTCCTCGGAGTCGCGGCTCTCGCCAGCACCGTCGTCAACGCCATGCCCTCCACGCTCGAGGCCAGGGCCCTTCCCCAGGTTTCGGCCGTCGCCAAGCCGAGGGCGTGCTCCTCGTACCCGACCTTTGATCCCGCCACCGGCGAGGCTACCGAATTCATATTCTATGCCGACTCGACCGAGGAGCCTGTCGCTCCGTTCGCCGGTAGCGTGGTGGGGAAGTTGGCCAACCCCAACCTGGCCATTGCACGGATCGGAATCGCCGTCCGCGGAGATCTCGCGAAGGTCGTGACCAAGTGCTTCCCCGACGGCGGCGAAGAGGGACTCCGCACCCGCACGCACGGCGACTGGAGACGTCTCACCCTTGCCGGAGGCGAGGACGAA…
>MGG_13009_YN072311 885 YN072311_contig_1562_151327:56886-56002
ATGCGCACCCAGTTCTCTCTCCTCGGAGTCGCGGCTCTCGCCAGCACCGTCGTCAACGCCATGCCCTCCACGCTCGAGGCCAGGGCCCTTCCCCAGGTTTCGGCCGTCGCCAAGCCGAGGGCGTGCTCCTCGTACCCGACCTTTGATCCCGCCACCGGCGAGGCTACCGAATTCATATTCTATGCCGACTCGACCGAGGAGCCTGTCGCTCCGTTCGCCGGTAGCGTGGTGGGGAAGTTGGCCAACCCCAACCTGGCCATTGCACGGATCGGAATCGCCGTCCGCGGAGATCTCGCGAAGGTCGTGACCAAGTGCTTCCCCGACGGCGGCGAAGAGGGACTCCGCACCCGCACGCACGGCGACTGGAGACGTCTCACCCTTGCCGGAGGCGAGGACGAA…
>MGG_13009_YN072313 885 YN072313_contig_1597_78649:56881-55997
ATGCGCACCCAGTTCTCTCTCCTCGGAGTCGCGGCTCTCGCCAGCACCGTCGTCAACGCCATGCCCTCCACGCTCGAGGCCAGGGCCCTTCCCCAGGTTTCGGCCGTCGCCAAGCCGAGGGCGTGCTCCTCGTACCCGACCTTTGATCCCGCCACCGGCGAGGCTACCGAATTCATATTCTATGCCGACTCGACCGAGGAGCCTGTCGCTCCGTTCGCCGGTAGCGTGGTGGGGAAGTTGGCCAACCCCAACCTGGCCATTGCACGGATCGGAATCGCCGTCCGCGGAGATCTCGCGAAGGTCGTGACCAAGTGCTTCCCCGACGGCGGCGAAGAGGGACTCCGCACCCGCACGCACGGCGACTGGAGACGTCTCACCCTTGCCGGAGGCGAGGACGAA…
>MGG_13009_YN08181e 886 YN08181e_contig_985_331718:230246-231131
ATGCGCACCCAGTTCTCTCTCCTCGGAGTCGCGGCTCTCGCCAGCACCGTCGTCAACGCCATGCCCTCCACGCTCGAGGCCAGGGCCCTTCCCCAGGTTTCGGCCGTCGCCAAGCCGAGGGCGTGCTCCTCGTACCCGACCTTTGATCCCGCCACCGGCGAGGCTACCGAATTCATATTCTATGCCGACTCGACCGAGGAGCCTGTCGCTCCGTTCGCCGGTAGCGTGGTGGGGAAGTTGGCCAACCCCAACCTGGCCATTGCACGGATCGGAATCGCCGTCCGCGGAGATCTCGCGAAGGTCGTGACCAAGTGCTTCCCCGACGGCGGCGAAGAGGGACTCCGCACCCGCACGCACGGCGACTGGAGACGTCTCACCCTTGCCGGAGGCGAGGACGAA…
>MGG_13009_YN08182c 886 YN08182c_contig_1764_195806:101464-100579
ATGCGCACCCAGTTCTCTCTCCTCGGAGTCGCGGCTCTCGCCAGCACCGTCGTCAACGCCATGCCCTCCACGCTCGAGGCCAGGGCCCTTCCCCAGGTTTCGGCCGTCGCCAAGCCGAGGGCGTGCTCCTCGTACCCGACCTTTGATCCCGCCACCGGCGAGGCTACCGAATTCATATTCTATGCCGACTCGACCGAGGAGCCTGTCGCTCCGTTCGCCGGTAGCGTGGTGGGGAAGTTGGCCAACCCCAACCTGGCCATTGCACGGATCGGAATCGCCGTCCGCGGAGATCTCGCGAAGGTCGTGACCAAGTGCTTCCCCGACGGCGGCGAAGAGGGACTCCGCACCCGCACGCACGGCGACTGGAGACGTCTCACCCTTGCCGGAGGCGAGGACGAA…
>MGG_13009_YN126311 885 YN126311_contig_1710_151282:56874-55990
ATGCGCACCCAGTTCTCTCTCCTCGGAGTCGCGGCTCTCGCCAGCACCGTCGTCAACGCCATGCCCTCCACGCTCGAGGCCAGGGCCCTTCCCCAGGTTTCGGCCGTCGCCAAGCCGAGGGCGTGCTCCTCGTACCCGACCTTTGATCCCGCCACCGGCGAGGCTACCGAATTCATATTCTATGCCGACTCGACCGAGGAGCCTGTCGCTCCGTTCGCCGGTAGCGTGGTGGGGAAGTTGGCCAACCCCAACCTGGCCATTGCACGGATCGGAATCGCCGTCCGCGGAGATCTCGCGAAGGTCGTGACCAAGTGCTTCCCCGACGGCGGCGAAGAGGGACTCCGCACCCGCACGCACGGCGACTGGAGACGTCTCACCCTTGCCGGAGGCGAGGACGAA…
>MGG_13009_YN126441 885 YN126441_contig_1271_127627:56819-55935
ATGCGCACCCAGTTCTCTCTCCTCGGAGTCGCGGCTCTCGCCAGCACCGTCGTCAACGCCATGCCCTCCACGCTCGAGGCCAGGGCCCTTCCCCAGGTTTCGGCCGTCGCCAAGCCGAGGGCGTGCTCCTCGTACCCGACCTTTGATCCCGCCACCGGCGAGGCTACCGAATTCATATTCTATGCCGACTCGACCGAGGAGCCTGTCGCTCCGTTCGCCGGTAGCGTGGTGGGGAAGTTGGCCAACCCCAACCTGGCCATTGCACGGATCGGAATCGCCGTCCGCGGAGATCTCGCGAAGGTCGTGACCAAGTGCTTCCCCGACGGCGGCGAAGAGGGACTCCGCACCCGCACGCACGGCGACTGGAGACGTCTCACCCTTGCCGGAGGCGAGGACGAA…
>MGG_13009_YN8773-19 885 YN8773-19_contig_396_251847:17016-16132
ATGCGCACCCAGTTCTCTCTCCTCGGAGTCGCGGCTCTCGCCAGCACCGTCGTCAACGCCATGCCCTCCACGCTCGAGGCCAGGGCCCTTCCCCAGGTTTCGGCCGTCGCCAAGCCGAGGGCGTGCTCCTCGTACCCGACCTTTGATCCCGCCACCGGCGAGGCTACCGAATTCATATTCTATGCCGACTCGACCGAGGAGCCTGTCGCTCCGTTCGCCGGTAGCGTGGTGGGGAAGTTGGCCAACCCCAACCTGGCCATTGCACGGATCGGAATCGCCGTCCGCGGAGATCTCGCGAAGGTCGTGACCAAGTGCTTCCCCGACGGCGGCGAAGAGGGACTCCGCACCCGCACGCACGGCGACTGGAGACGTCTCACCCTTGCCGGAGGCGAGGACGAA…
>MGG_13009_YN8773R-27 886 YN8773R-27_contig_1042_135649:34209-35094
ATGCGCACCCAGTTCTCTCTCCTCGGAGTCGCGGCTCTCGCCAGCACCGTCGTCAACGCCATGCCCTCCACGCTCGAGGCCAGGGCCCTTCCCCAGGTTTCGGCCGTCGCCAAGCCGAGGGCGTGCTCCTCGTACCCGACCTTTGATCCCGCCACCGGCGAGGCTACCGAATTCATATTCTATGCCGACTCGACCGAGGAGCCTGTCGCTCCGTTCGCCGGTAGCGTGGTGGGGAAGTTGGCCAACCCCAACCTGGCCATTGCACGGATCGGAATCGCCGTCCGCGGAGATCTCGCGAAGGTCGTGACCAAGTGCTTCCCCGACGGCGGCGAAGAGGGACTCCGCACCCGCACGCACGGCGACTGGAGACGTCTCACCCTTGCCGGAGGCGAGGACGAA…
>MGG_13009_ZJ00-10 885 ZJ00-10_contig_1416_91042:56862-55979
ATGCGCACCCAGTTCTCTCTCCTCGGAGTCGCGGCTCTCGCCAGCACCGTCGTCAACGCCATGCCCTCCACGCTCGAGGCCAGGGCCCTTCCCCAGGTTTCGGCCGTCGCCAAGCCGAGGGCGTGCTCCTCGTACCCGACCTTTGATCCCGCCACCGGCGAGGCTACCGAATTCATATTCTATGCCGACTCGACCGAGGAGCCTGTCGCTCCGTTCGCCGGTAGCGTGGTGGGGAAGTTGGCCAACCCCAACCTGGCCATTGCACGGATCGGAATCGCCGTCCGCGGAGATCTCGCGAAGGTCGTGACCAAGTGCTTCCCCGACGGCGGCGAAGAGGGACTCCGCACCCGCACGCACGGCGACTGGAGACGTCTCACCCTTGCCGGAGGCGAGGACGAA…
>MGG_13009_ZJ08-41 885 ZJ08-41_contig_162_91081:56893-56010
ATGCGCACCCAGTTCTCTCTCCTCGGAGTCGCGGCTCTCGCCAGCACCGTCGTCAACGCCATGCCCTCCACGCTCGAGGCCAGGGCCCTTCCCCAGGTTTCGGCCGTCGCCAAGCCGAGGGCGTGCTCCTCGTACCCGACCTTTGATCCCGCCACCGGCGAGGCTACCGAATTCATATTCTATGCCGACTCGACCGAGGAGCCTGTCGCTCCGTTCGCCGGTAGCGTGGTGGGGAAGTTGGCCAACCCCAACCTGGCCATTGCACGGATCGGAATCGCCGTCCGCGGAGATCTCGCGAAGGTCGTGACCAAGTGCTTCCCCGACGGCGGCGAAGAGGGACTCCGCACCCGCACGCACGGCGACTGGAGACGTCTCACCCTTGCCGGAGGCGAGGACGAA…
>MGG_13009_ZJ2011-7-1 885 ZJ2011-7-1_contig_191_458083:237292-238175
ATGCGCACCCAGTTCTCTCTCCTCGGAGTCGCGGCTCTCGCCAGCACCGTCGTCAACGCCATGCCCTCCACGCTCGAGGCCAGGGCCCTTCCCCAGGTTTCGGCCGTCGCCAAGCCGAGGGCGTGCTCCTCGTACCCGACCTTTGATCCCGCCACCGGCGAGGCTACCGAATTCATATTCTATGCCGACTCGACCGAGGAGCCTGTCGCTCCGTTCGCCGGTAGCGTGGTGGGGAAGTTGGCCAACCCCAACCTGGCCATTGCACGGATCGGAATCGCCGTCCGCGGAGATCTCGCGAAGGTCGTGACCAAGTGCTTCCCCGACGGCGGCGAAGAGGGACTCCGCACCCGCACGCACGGCGACTGGAGACGTCTCACCCTTGCCGGAGGCGAGGACGAA…
>MGG_13009_Jiangsu 1#
ATGCGCACCCAGTTCTCTCTCCTCGGAGTCGCGGCTCTCGCCAGCACCGTCGTCAACGCCATGCCCTCCACGCTCGAGGCCAGGGCCCTTCCCCAGGTTTCGGCCGTCGCCAAGCCGAGGGCGTGCTCCTCGTACCCGACCTTTGATCCCGCCACCGGCGAGGCTACCGAATTCATATTCTATGCCGACTCGACCGAGGAGCCTGTCGCTCCGTTCGCCGGTAGCGTGGTGGGGAAGTTGGCCAACCCCAACCTGGCCATTGCACGGATCGGAATCGCCGTCCGCGGAGATCTCGCGAAGGTCGTGACCAAGTGCTTCCCCGACGGCGGCGAAGAGGGACTCCGCACCCGCACGCACGGCGACTGGAGACGTCTCACCCTTGCCGGAGGCGAGGACGAA…
>MGG_13009_Jiangsu 2#
ATGCGCACCCAGTTCTCTCTCCTCGGAGTCGCGGCTCTCGCCAGCACCGTCGTCAACGCCATGCCCTCCACGCTCGAGGCCAGGGCCCTTCCCCAGGTTTCGGCCGTCGCCAAGCCGAGGGCGTGCTCCTCGTACCCGACCTTTGATCCCGCCACCGGCGAGGCTACCGAATTCATATTCTATGCCGACTCGACCGAGGAGCCTGTCGCTCCGTTCGCCGGTAGCGTGGTGGGGAAGTTGGCCAACCCCAACCTGGCCATTGCACGGATCGGAATCGCCGTCCGCGGAGATCTCGCGAAGGTCGTGACCAAGTGCTTCCCCGACGGCGGCGAAGAGGGACTCCGCACCCGCACGCACGGCGACTGGAGACGTCTCACCCTTGCCGGAGGCGAGGACGAA…
>MGG_13009_Jiangsu 3#
ATGCGCACCCAGTTCTCTCTCCTCGGAGTCGCGGCTCTCGCCAGCACCGTCGTCAACGCCATGCCCTCCACGCTCGAGGCCAGGGCCCTTCCCCAGGTTTCGGCCGTCGCCAAGCCGAGGGCGTGCTCCTCGTACCCGACCTTTGATCCCGCCACCGGCGAGGCTACCGAATTCATATTCTATGCCGACTCGACCGAGGAGCCTGTCGCTCCGTTCGCCGGTAGCGTGGTGGGGAAGTTGGCCAACCCCAACCTGGCCATTGCACGGATCGGAATCGCCGTCCGCGGAGATCTCGCGAAGGTCGTGACCAAGTGCTTCCCCGACGGCGGCGAAGAGGGACTCCGCACCCGCACGCACGGCGACTGGAGACGTCTCACCCTTGCCGGAGGCGAGGACGAA…
>MGG_13009_Jiangsu 4#
ATGCGCACCCAGTTCTCTCTCCTCGGAGTCGCGGCTCTCGCCAGCACCGTCGTCAACGCCATGCCCTCCACGCTCGAGGCCAGGGCCCTTCCCCAGGTTTCGGCCGTCGCCAAGCCGAGGGCGTGCTCCTCGTACCCGACCTTTGATCCCGCCACCGGCGAGGCTACCGAATTCATATTCTATGCCGACTCGACCGAGGAGCCTGTCGCTCCGTTCGCCGGTAGCGTGGTGGGGAAGTTGGCCAACCCCAACCTGGCCATTGCACGGATCGGAATCGCCGTCCGCGGAGATCTCGCGAAGGTCGTGACCAAGTGCTTCCCCGACGGCGGCGAAGAGGGACTCCGCACCCGCACGCACGGCGACTGGAGACGTCTCACCCTTGCCGGAGGCGAGGACGAA…
>MGG_13009_Jiangsu 5#
ATGCGCACCCAGTTCTCTCTCCTCGGAGTCGCGGCTCTCGCCAGCACCGTCGTCAACGCCATGCCCTCCACGCTCGAGGCCAGGGCCCTTCCCCAGGTTTCGGCCGTCGCCAAGCCGAGGGCGTGCTCCTCGTACCCGACCTTTGATCCCGCCACCGGCGAGGCTACCGAATTCATATTCTATGCCGACTCGACCGAGGAGCCTGTCGCTCCGTTCGCCGGTAGCGTGGTGGGGAAGTTGGCCAACCCCAACCTGGCCATTGCACGGATCGGAATCGCCGTCCGCGGAGATCTCGCGAAGGTCGTGACCAAGTGCTTCCCCGACGGCGGCGAAGAGGGACTCCGCACCCGCACGCACGGCGACTGGAGACGTCTCACCCTTGCCGGAGGCGAGGACGAA…
>MGG_13009_Jiangsu 6#
ATGCGCACCCAGTTCTCTCTCCTCGGAGTCGCGGCTCTCGCCAGCACCGTCGTCAACGCCATGCCCTCCACGCTCGAGGCCAGGGCCCTTCCCCAGGTTTCGGCCGTCGCCAAGCCGAGGGCGTGCTCCTCGTACCCGACCTTTGATCCCGCCACCGGCGAGGCTACCGAATTCATATTCTATGCCGACTCGACCGAGGAGCCTGTCGCTCCGTTCGCCGGTAGCGTGGTGGGGAAGTTGGCCAACCCCAACCTGGCCATTGCACGGATCGGAATCGCCGTCCGCGGAGATCTCGCGAAGGTCGTGACCAAGTGCTTCCCCGACGGCGGCGAAGAGGGACTCCGCACCCGCACGCACGGCGACTGGAGACGTCTCACCCTTGCCGGAGGCGAGGACGAA…
